# Supplementary material for: Combining confocal microscopy, dSTORM, and mass spectroscopy to unveil the evolution of the protein corona associated with nanostructured lipid carriers during blood–brain barrier crossing
Source: Royal Society of Chemistry journal article supplement (doi:10.1039/d2nr00484d), 2022-01-01
Supplement: d2nr00484d1.pdf [file d2nr00484d1.pdf]

**Supporting information for**

**Combining confocal microscopy, dSTORM, and mass spectroscopy to unveil the evolution of the protein corona associated with nanostructured lipid carriers during blood-brain barrier crossing**

Matteo Battaglini\*<sup>1</sup>, Natalia Feiner<sup>2,3</sup>, Christos Tapeinos<sup>1</sup>, Daniele De Pasquale<sup>1</sup>, Carlotta Pucci<sup>1</sup>, Attilio Marino<sup>1</sup>, Martina Bartolucci<sup>4</sup>, Andrea Petretto<sup>4</sup>, Lorenzo Albertazzi<sup>2,3</sup>, Gianni Ciofani\*<sup>1</sup>

<sup>1</sup>Istituto Italiano di Tecnologia, Smart Bio-Interfaces, Viale Rinaldo Piaggio 34, 56025 Pontedera (Pisa), Italy

<sup>2</sup>Eindhoven University of Technology Department of Biomedical Engineering and Institute for Complex Molecular Systems (ICMS), PO Box 513, 5612AZ Eindhoven, The Netherlands

<sup>3</sup>Institute for Bioengineering of Catalonia, Nanoscopy for Nanomedicine, Carrer de Baldiri Reixac 10-12, 08028 Barcelona, Spain

<sup>4</sup>IRCCS Istituto Giannina Gaslini, Core Facilities-Clinical Proteomics and Metabolomics, Via Gerolamo Gaslini 5, 16147 Genova, Italy

\*Corresponding authors: [matteo.battaglini@iit.it](mailto:matteo.battaglini@iit.it); [gianni.ciofani@iit.it](mailto:gianni.ciofani@iit.it)

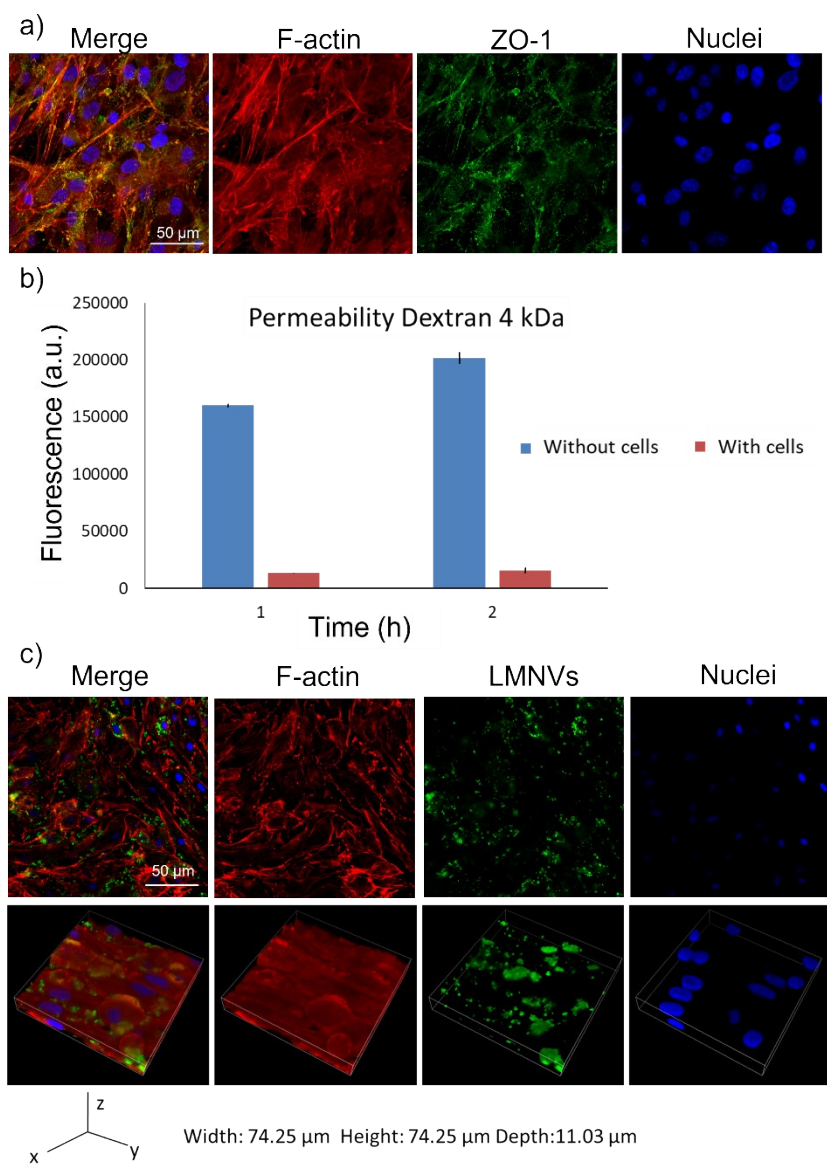

**Figure S1.** Characterization of the BBB *in vitro* model and interaction of LMNVs with bEnd.3 cells. a) Confocal images showing the expression ZO-1 by bEnd.3 cells (in red F-actin, in green ZO-1, in blue nuclei); b) analysis of the passage of fluorescent dextran 4 kDa at different time points (in blue the passage through a transwell without cells and in red the passage through a transwell seeded with bEnd.3 cells); c) confocal images and 3D rendering showing the internalization of LMNVs by bEnd.3 cells (in red F-actin, in green LMNVs, in blue nuclei).

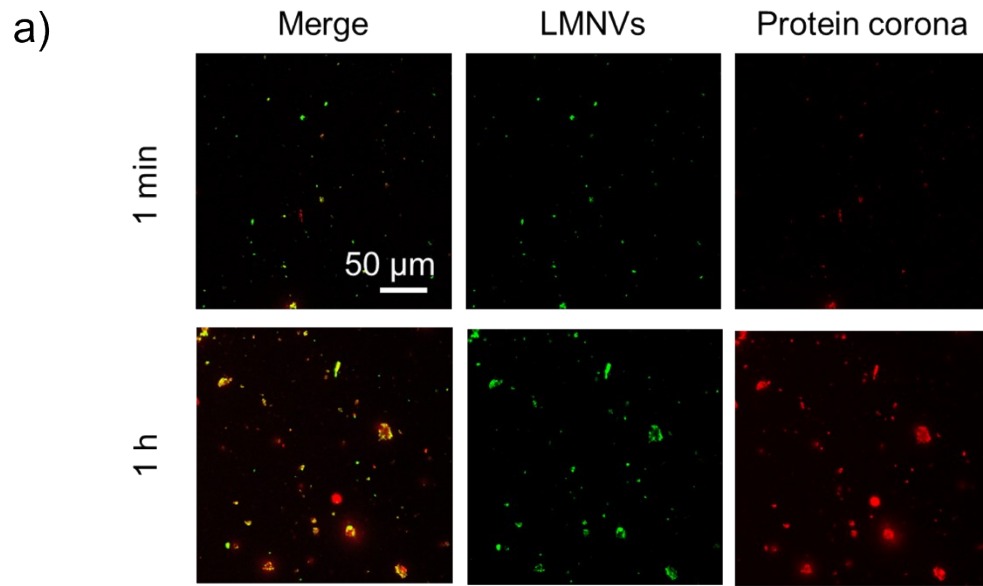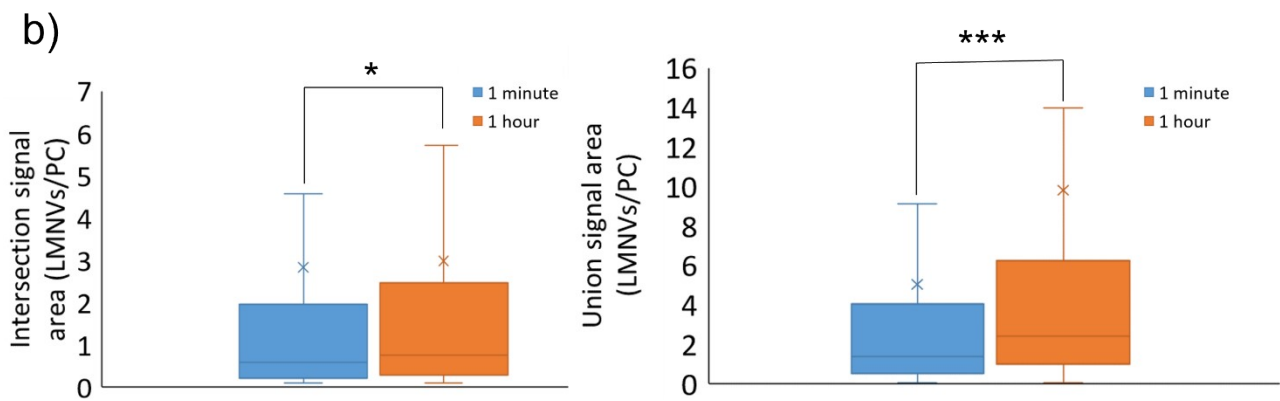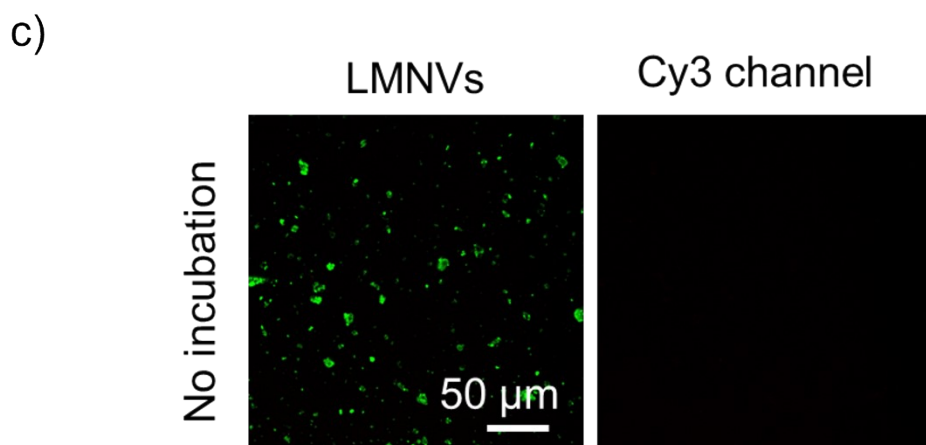

**Figure S2.** a) Confocal images showing the PC formation associated with LMNVs after different period of incubation; b) analysis of the intersection and union area of LMNVs and PC signals in different conditions; c) control confocal images showing LMNVs incubated with non-stained FBS (\*  $p < 0.05$ , \*\*\*  $p < 0.001$ ).

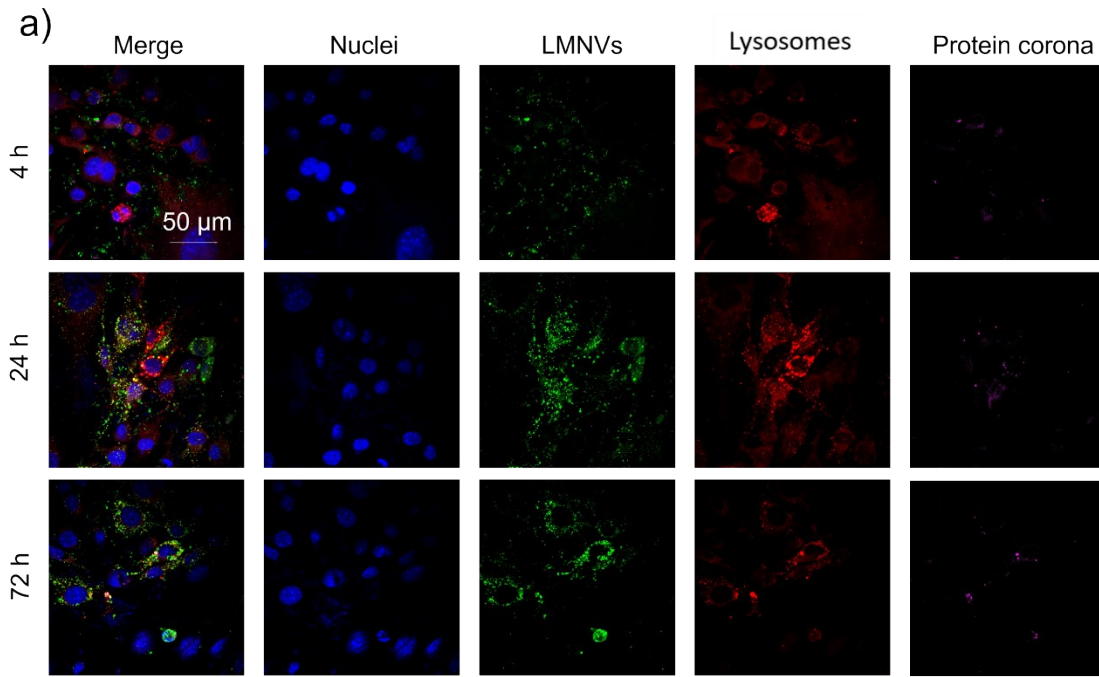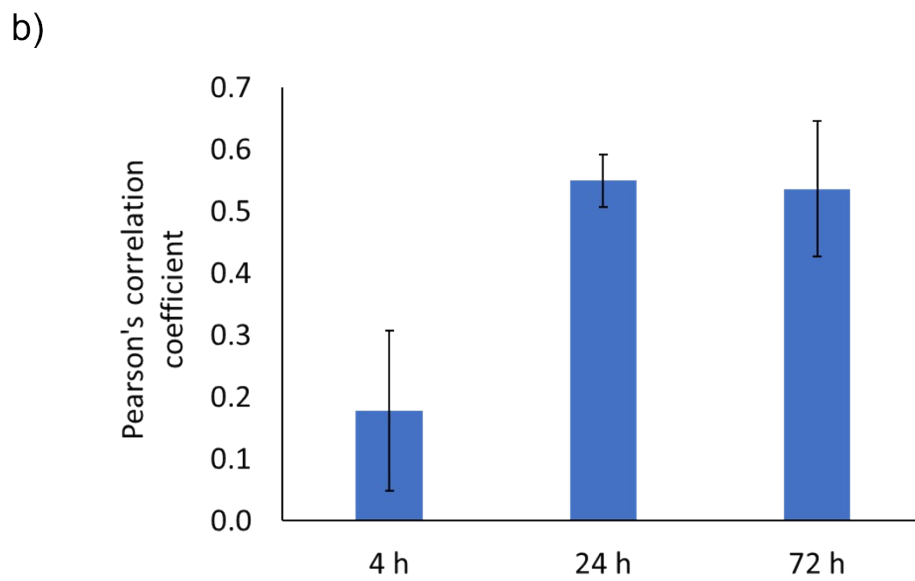

**Figure S3.** Analysis of LMNVs co-localization with lysosomes. a) confocal images showing the intracellular localization of LMNVs at different time points (in blue nuclei, in green LMNVs, in red lysosomes, in magenta protein corona); b) plot showing the Pearson's correlation coefficient between LMNV and lysosome fluorescence signals at different time points.

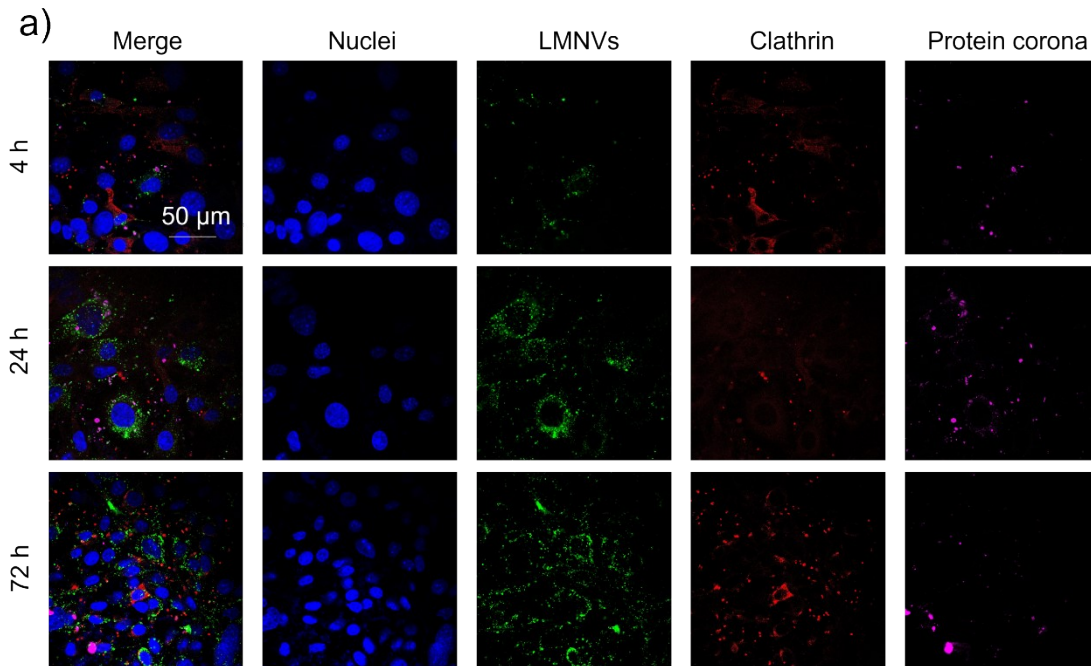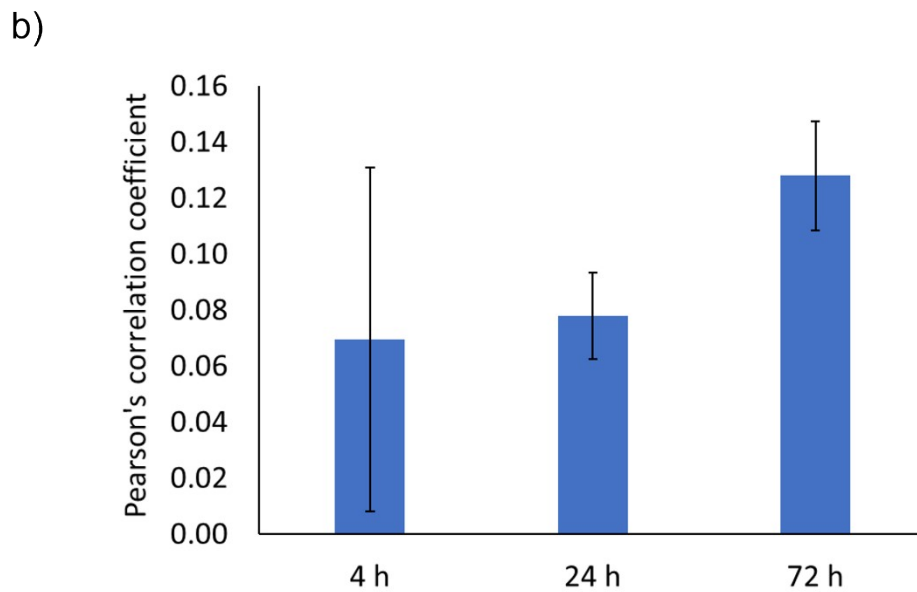

**Figure S4.** Analysis of LMNVs co-localization with clathrin-positive vesicles. a) Confocal images showing the intracellular localization of LMNVs at different time points (in blue nuclei, in green LMNVs, in red clathrin-positive vesicles, in magenta protein corona); b) plot showing the Pearson's correlation coefficient between LMNV and clathrin-positive vesicle fluorescence signals at different time points.

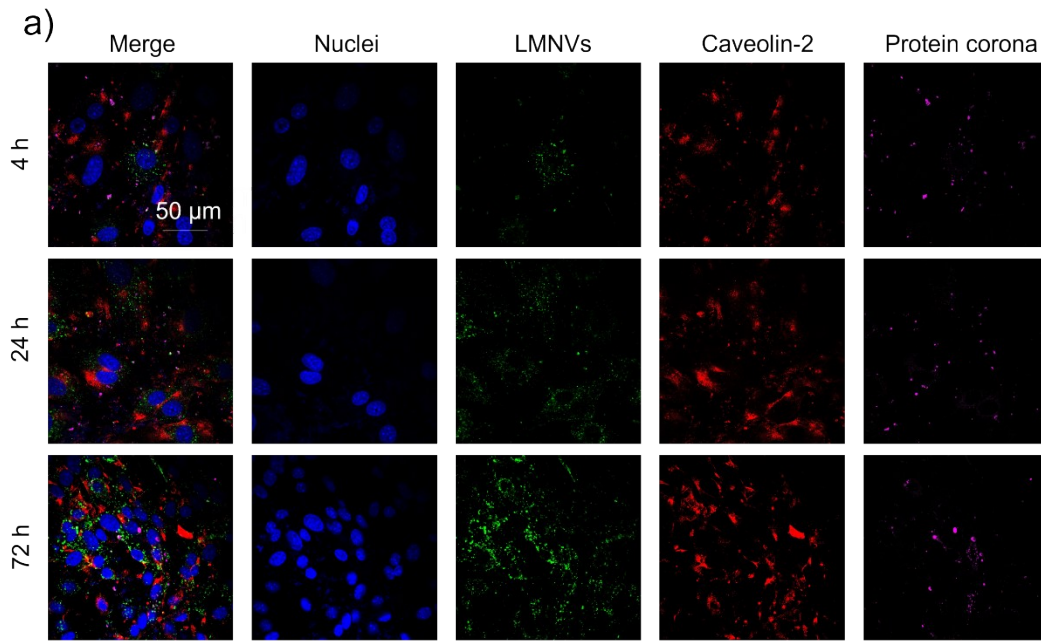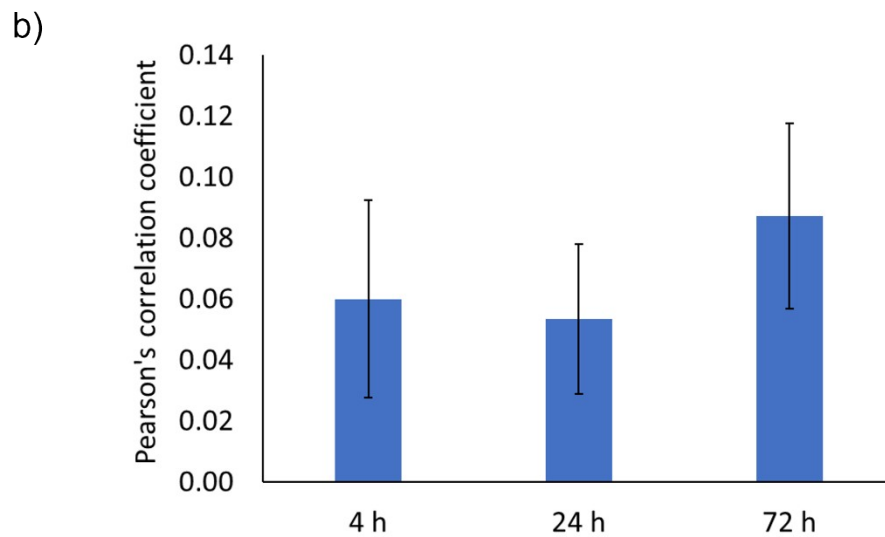

**Figure S5.** Analysis of LMNVs co-localization with caveolin-positive vesicles. a) Confocal images showing the intracellular localization of LMNVs at different time points (in blue nuclei, in green LMNVs, in red caveoline-positive, in magenta protein corona); b) plot showing the Pearson's correlation coefficient between LMNVs and caveoline-positive vesicle fluorescence signals at different time points.

**Table S1.** Proteins present in LMNV-PC after BBB passage.

| <b>Taxonomy</b> | <b>Cluster</b> | <b>Gene names</b> | <b>Protein names</b>                                            |
|-----------------|----------------|-------------------|-----------------------------------------------------------------|
| Mus musculus    | Cluster 208    | Cs;Csl            | Citrate synthase;Citrate synthase, mitochondrial                |
| Mus musculus    | Cluster 179    | Kpna2             | Importin subunit alpha-1                                        |
| Mus musculus    | Cluster -422   | Atp5b             | ATP synthase subunit beta, mitochondrial                        |
| Bos taurus      | Cluster -422   | KIF22             | Kinesin-like protein KIF22                                      |
| Bos taurus      | Cluster -422   | N/A               | N/A                                                             |
| Bos taurus      | Cluster -422   | N/A               | N/A                                                             |
| Mus musculus    | Cluster -422   | Eno1              | Alpha-enolase;Enolase                                           |
| Mus musculus    | Cluster -422   | Lmna              | Prelamin-A/C;Lamin-A/C                                          |
| Mus musculus    | Cluster -422   | Wdr90             | WD repeat-containing protein 90                                 |
| Mus musculus    | Cluster -422   | Cd151             | CD151 antigen                                                   |
| Mus musculus    | Cluster -422   | Mdn1              | N/A                                                             |
| Mus musculus    | Cluster -422   | S100a4            | Protein S100-A4                                                 |
| Mus musculus    | Cluster -422   | Hsp90b1           | Endoplasmin                                                     |
| Mus musculus    | Cluster -422   | Mtco2             | Cytochrome c oxidase subunit 2                                  |
| Bos taurus      | Cluster -422   | CAST              | Calpastatin                                                     |
| Mus musculus    | Cluster -422   | Anxa2             | Annexin;Annexin A2                                              |
| Mus musculus    | Cluster -422   | Itgb1             | Integrin beta-1                                                 |
| Mus musculus    | Cluster -422   | Prr30             | Proline-rich protein 30                                         |
| Mus musculus    | Cluster -422   | Pgk1              | Phosphoglycerate kinase 1;Phosphoglycerate kinase               |
| Mus musculus    | Cluster -422   | Tpt1              | Translationally-controlled tumor protein                        |
| Mus musculus    | Cluster -422   | Sqstm1            | Sequestosome-1                                                  |
| Bos taurus      | Cluster -422   | N/A               | N/A                                                             |
| Mus musculus    | Cluster -422   | Aldoa;Aldoart1    | Fructose-bisphosphate aldolase;Fructose-bisphosphate aldolase A |
| Mus musculus    | Cluster -422   | Pgam1             | Phosphoglycerate mutase 1                                       |
| Bos taurus      | Cluster -422   | N/A               | N/A                                                             |
| Mus musculus    | Cluster -422   | Lrrc59            | Leucine-rich repeat-containing protein 59                       |
| Mus musculus    | Cluster -422   | Tymp              | Thymidine phosphorylase                                         |
| Mus musculus    | Cluster -422   | Xirp2             | Xin actin-binding repeat-containing protein 2                   |

|              |              |              |                                                                                                                               |
|--------------|--------------|--------------|-------------------------------------------------------------------------------------------------------------------------------|
| Bos taurus   | Cluster -422 | MYL12B       | Myosin regulatory light chain 12B                                                                                             |
| Mus musculus | Cluster -422 | Psap         | Prosaposin                                                                                                                    |
| Mus musculus | Cluster -422 | Ftl1;Ftl2    | Ferritin;Ferritin light chain 1;Ferritin light chain 2                                                                        |
| Mus musculus | Cluster -422 | Mfge8        | Lactadherin                                                                                                                   |
| Mus musculus | Cluster -422 | Fv4          | MLV-related proviral Env polyprotein;Surface protein;Transmembrane protein;Retrovirus-related Env polyprotein from Fv-4 locus |
| Mus musculus | Cluster -422 | Iqgap1       | Ras GTPase-activating-like protein IQGAP1                                                                                     |
| Bos taurus   | Cluster -422 | ERO1A        | ERO1-like protein alpha                                                                                                       |
| Mus musculus | Cluster -422 | Pdia3        | Protein disulfide-isomerase A3                                                                                                |
| Mus musculus | Cluster -422 | Slc25a4      | ADP/ATP translocase 1                                                                                                         |
| Mus musculus | Cluster -422 | Etfb         | Electron transfer flavoprotein subunit beta                                                                                   |
| Mus musculus | Cluster -422 | Ddost        | Dolichyl-diphosphooligosaccharide--protein glycosyltransferase 48 kDa subunit                                                 |
| Mus musculus | Cluster -422 | Shmt2        | Serine hydroxymethyltransferase                                                                                               |
| Mus musculus | Cluster -422 | Vim          | Vimentin                                                                                                                      |
| Bos taurus   | Cluster -422 | N/A          | N/A                                                                                                                           |
| Mus musculus | Cluster -422 | Sars         | N/A                                                                                                                           |
| Mus musculus | Cluster -422 | Gm20390;Nme2 | Nucleoside diphosphate kinase;Nucleoside diphosphate kinase B                                                                 |
| Mus musculus | Cluster -422 | Ssr4         | Translocon-associated protein subunit delta                                                                                   |
| Mus musculus | Cluster -422 | Fth1         | Ferritin heavy chain;Ferritin heavy chain, N-terminally processed                                                             |
| Mus musculus | Cluster -422 | Gapdh;Gm3839 | Glyceraldehyde-3-phosphate dehydrogenase                                                                                      |
| Mus musculus | Cluster 219  | Lrg1         | N/A                                                                                                                           |
| Mus musculus | Cluster -424 | Prss55       | Serine protease 55                                                                                                            |
| Mus musculus | Cluster 44   | Msn          | Moesin                                                                                                                        |
| Mus musculus | Cluster -425 | Dld          | Dihydrolipoyl dehydrogenase, mitochondrial                                                                                    |
| Bos taurus   | Cluster -425 | SOD1         | Superoxide dismutase [Cu-Zn];Superoxide dismutase [Cu-Zn] {ECO:0000256 RuleBase:RU000393}                                     |
| Mus musculus | Cluster -425 | Cd63         | CD63 antigen                                                                                                                  |
| Mus musculus | Cluster -425 | Ndufa6       | NADH dehydrogenase [ubiquinone] 1 alpha subcomplex subunit 6                                                                  |
| Mus musculus | Cluster -425 | 02-set       | Septin-2                                                                                                                      |
| Mus musculus | Cluster -425 | Eprs         | Bifunctional glutamate/proline--tRNA ligase;Glutamate--tRNA ligase;Proline--tRNA ligase                                       |



|              |              |         |                                                                              |
|--------------|--------------|---------|------------------------------------------------------------------------------|
| Mus musculus | Cluster -425 | Prdx6   | Peroxiredoxin-6                                                              |
| Mus musculus | Cluster -425 | Actn4   | Alpha-actinin-4                                                              |
| Mus musculus | Cluster -425 | Mrps36  | 28S ribosomal protein S36, mitochondrial                                     |
| Mus musculus | Cluster -425 | Itga5   | Integrin alpha-5;Integrin alpha-5 heavy chain;Integrin alpha-5 light chain   |
| Mus musculus | Cluster -425 | Prc1    | Protein regulator of cytokinesis 1                                           |
| Mus musculus | Cluster -425 | Ptgs2   | Prostaglandin G/H synthase 2                                                 |
| Mus musculus | Cluster -425 | Ckap4   | Cytoskeleton-associated protein 4                                            |
| Mus musculus | Cluster -425 | Prdx3   | Thioredoxin-dependent peroxide reductase, mitochondrial                      |
| Mus musculus | Cluster -425 | Plec    | Plectin                                                                      |
| Mus musculus | Cluster -425 | Grpel1  | GrpE protein homolog 1, mitochondrial                                        |
| Mus musculus | Cluster -425 | Pmpca   | Mitochondrial-processing peptidase subunit alpha                             |
| Mus musculus | Cluster -425 | Ndufs2  | NADH dehydrogenase [ubiquinone] iron-sulfur protein 2, mitochondrial         |
| Mus musculus | Cluster -425 | Ndufa10 | NADH dehydrogenase [ubiquinone] 1 alpha subcomplex subunit 10, mitochondrial |
| Mus musculus | Cluster -425 | Capns1  | Calpain small subunit 1                                                      |
| Mus musculus | Cluster -425 | Acads   | Short-chain specific acyl-CoA dehydrogenase, mitochondrial                   |
| Mus musculus | Cluster -425 | Pitrm1  | Presequence protease, mitochondrial                                          |
| Mus musculus | Cluster -425 | Rcn2    | Reticulocalbin-2                                                             |
| Mus musculus | Cluster -425 | Pon2    | Serum paraoxonase/arylesterase 2                                             |
| Mus musculus | Cluster -425 | Ogfr    | Opioid growth factor receptor                                                |
| Mus musculus | Cluster -425 | Mogs    | Mannosyl-oligosaccharide glucosidase                                         |
| Mus musculus | Cluster -425 | Tpm4    | Tropomyosin alpha-4 chain                                                    |
| Mus musculus | Cluster -425 | Calcr1  | Calcitonin gene-related peptide type 1 receptor                              |
| Mus musculus | Cluster -425 | Cat     | Catalase                                                                     |
| Mus musculus | Cluster -425 | Cct2    | T-complex protein 1 subunit beta                                             |
| Mus musculus | Cluster -425 | Cd93    | Complement component C1q receptor                                            |
| Mus musculus | Cluster -425 | Lap3    | Cytosol aminopeptidase                                                       |
| Mus musculus | Cluster -425 | Mthfd11 | Monofunctional C1-tetrahydrofolate synthase, mitochondrial                   |

|              |              |          |                                                                                      |
|--------------|--------------|----------|--------------------------------------------------------------------------------------|
| Mus musculus | Cluster -425 | Tpbg     | Trophoblast glycoprotein                                                             |
| Mus musculus | Cluster -425 | Eif3f    | Eukaryotic translation initiation factor 3 subunit F                                 |
| Mus musculus | Cluster -425 | Nid1     | Nidogen-1                                                                            |
| Mus musculus | Cluster -425 | Rpl7     | 60S ribosomal protein L7                                                             |
| Mus musculus | Cluster -425 | Anxa4    | Annexin;Annexin A4                                                                   |
| Mus musculus | Cluster -425 | Tln1     | Talin-1                                                                              |
| Mus musculus | Cluster -425 | Plscr3   | Phospholipid scramblase 3                                                            |
| Mus musculus | Cluster -425 | Apob     | Apolipoprotein B-100;Apolipoprotein B-48                                             |
| Mus musculus | Cluster -425 | Pdia4    | Protein disulfide-isomerase A4                                                       |
| Mus musculus | Cluster -425 | Acat1    | Acetyl-CoA acetyltransferase, mitochondrial                                          |
| Mus musculus | Cluster -425 | Gpd2     | Glycerol-3-phosphate dehydrogenase, mitochondrial;Glycerol-3-phosphate dehydrogenase |
| Mus musculus | Cluster -425 | Wdr1     | WD repeat-containing protein 1                                                       |
| Mus musculus | Cluster -425 | Cap1     | Adenylyl cyclase-associated protein 1                                                |
| Mus musculus | Cluster -425 | Cyb5r1   | NADH-cytochrome b5 reductase 1                                                       |
| Mus musculus | Cluster -425 | Acadv1   | Very long-chain specific acyl-CoA dehydrogenase, mitochondrial                       |
| Mus musculus | Cluster -425 | Golim4   | Golgi integral membrane protein 4                                                    |
| Mus musculus | Cluster -425 | N/A      | N/A                                                                                  |
| Mus musculus | Cluster -425 | Eth1     | Persulfide dioxygenase ETHE1, mitochondrial                                          |
| Mus musculus | Cluster -425 | Cox4i1   | Cytochrome c oxidase subunit 4 isoform 1, mitochondrial                              |
| Mus musculus | Cluster -425 | Colgalt1 | Procollagen galactosyltransferase 1                                                  |
| Mus musculus | Cluster -425 | Tmem109  | Transmembrane protein 109                                                            |
| Mus musculus | Cluster -425 | Pacsin2  | Protein kinase C and casein kinase substrate in neurons protein 2                    |
| Mus musculus | Cluster -425 | Vars     | Valine--tRNA ligase                                                                  |
| Mus musculus | Cluster -425 | Myh10    | Myosin-10                                                                            |
| Mus musculus | Cluster -425 | Htra1    | Serine protease HTRA1                                                                |
| Mus musculus | Cluster -425 | Znf106   | Zinc finger protein 106                                                              |
| Mus musculus | Cluster -425 | Entpd1   | Ectonucleoside triphosphate diphosphohydrolase 1                                     |

|              |              |                    |                                                                          |
|--------------|--------------|--------------------|--------------------------------------------------------------------------|
| Mus musculus | Cluster -425 | Acot2              | Acyl-coenzyme A thioesterase 2, mitochondrial                            |
| Mus musculus | Cluster -425 | Inf2               | Inverted formin-2                                                        |
| Mus musculus | Cluster -425 | Acadm              | Medium-chain specific acyl-CoA dehydrogenase, mitochondrial              |
| Mus musculus | Cluster -425 | Pus3               | tRNA pseudouridine synthase;tRNA pseudouridine(38/39) synthase           |
| Mus musculus | Cluster -425 | Sdha               | Succinate dehydrogenase [ubiquinone] flavoprotein subunit, mitochondrial |
| Mus musculus | Cluster -425 | Atp5a1             | ATP synthase subunit alpha;ATP synthase subunit alpha, mitochondrial     |
| Mus musculus | Cluster -425 | Ccdc157            | Coiled-coil domain-containing protein 157                                |
| Mus musculus | Cluster -425 | Carhsp1            | Calcium-regulated heat stable protein 1                                  |
| Mus musculus | Cluster -425 | Serpinb6;Serpinb6a | Serpin B6                                                                |
| Mus musculus | Cluster -425 | Gm1305;Kif28p      | Kinesin-like protein;Kinesin-like protein KIF28P                         |
| Mus musculus | Cluster -425 | Atl3               | Atlastin-3                                                               |
| Mus musculus | Cluster -425 | Vdac2              | Voltage-dependent anion-selective channel protein 2                      |
| Mus musculus | Cluster -425 | Atp5h              | ATP synthase subunit d, mitochondrial                                    |
| Mus musculus | Cluster -425 | Eci1               | Enoyl-CoA delta isomerase 1, mitochondrial                               |
| Mus musculus | Cluster -425 | Idh3b              | Isocitrate dehydrogenase [NAD] subunit, mitochondrial                    |
| Mus musculus | Cluster -425 | Cox7a2l            | Cytochrome c oxidase subunit 7A-related protein, mitochondrial           |
| Mus musculus | Cluster -425 | Prdx4              | Peroxiredoxin-4                                                          |
| Mus musculus | Cluster -425 | Slirp              | SRA stem-loop-interacting RNA-binding protein, mitochondrial             |
| Mus musculus | Cluster -425 | Dysf               | Dysferlin                                                                |
| Mus musculus | Cluster -425 | Pip4k2c            | Phosphatidylinositol 5-phosphate 4-kinase type-2 gamma                   |
| Mus musculus | Cluster -425 | Endod1             | Endonuclease domain-containing 1 protein                                 |
| Mus musculus | Cluster -425 | Mapk1              | Mitogen-activated protein kinase 1                                       |
| Mus musculus | Cluster -425 | Anp32b             | Acidic leucine-rich nuclear phosphoprotein 32 family member B            |
| Mus musculus | Cluster -425 | Rnh1               | Ribonuclease inhibitor                                                   |
| Mus musculus | Cluster -425 | Ldha               | L-lactate dehydrogenase;L-lactate dehydrogenase A chain                  |
| Mus musculus | Cluster -425 | S100a11            | Protein S100-A11                                                         |
| Mus musculus | Cluster -425 | Acaa1a             | 3-ketoacyl-CoA thiolase A, peroxisomal                                   |

|              |              |                |                                                                                                                             |
|--------------|--------------|----------------|-----------------------------------------------------------------------------------------------------------------------------|
| Mus musculus | Cluster -425 | Ncln           | Nicalin                                                                                                                     |
| Mus musculus | Cluster -425 | Hadha          | Long chain 3-hydroxyacyl-CoA dehydrogenase;Long-chain enoyl-CoA hydratase;Trifunctional enzyme subunit alpha, mitochondrial |
| Mus musculus | Cluster -425 | Flna           | Filamin-A                                                                                                                   |
| Mus musculus | Cluster -425 | Nnt            | NAD(P) transhydrogenase, mitochondrial                                                                                      |
| Bos taurus   | Cluster -425 | CL43           | Collectin-43                                                                                                                |
| Bos taurus   | Cluster -425 | COL3A1         | N/A                                                                                                                         |
| Mus musculus | Cluster -425 | Rpl4           | 60S ribosomal protein L4                                                                                                    |
| Mus musculus | Cluster -425 | Sdcbp          | Syntenin-1                                                                                                                  |
| Mus musculus | Cluster -425 | Dlst           | Dihydrolipoyllysine-residue succinyltransferase component of 2-oxoglutarate dehydrogenase complex, mitochondrial            |
| Mus musculus | Cluster -425 | Ppp2r1a        | Serine/threonine-protein phosphatase 2A 65 kDa regulatory subunit A alpha isoform                                           |
| Mus musculus | Cluster -425 | Rps271         | 40S ribosomal protein S27;40S ribosomal protein S27-like                                                                    |
| Mus musculus | Cluster -425 | Got2           | Aspartate aminotransferase, mitochondrial                                                                                   |
| Mus musculus | Cluster -425 | Hmox1          | Heme oxygenase 1                                                                                                            |
| Mus musculus | Cluster -425 | Aldh112        | Mitochondrial 10-formyltetrahydrofolate dehydrogenase                                                                       |
| Mus musculus | Cluster -425 | Tcp1           | T-complex protein 1 subunit alpha                                                                                           |
| Mus musculus | Cluster -425 | Acot10;Acot9   | Acyl-coenzyme A thioesterase 10, mitochondrial;Acyl-coenzyme A thioesterase 9, mitochondrial                                |
| Mus musculus | Cluster -425 | Bsg            | Basigin                                                                                                                     |
| Mus musculus | Cluster -425 | Pfkfb3         | ATP-dependent 6-phosphofructokinase;ATP-dependent 6-phosphofructokinase, platelet type                                      |
| Bos taurus   | Cluster -425 | N/A            | N/A                                                                                                                         |
| Mus musculus | Cluster -425 | Esyt1          | Extended synaptotagmin-1                                                                                                    |
| Mus musculus | Cluster -425 | Eef1g          | Elongation factor 1-gamma                                                                                                   |
| Mus musculus | Cluster -425 | Serpinh1       | Serpin H1                                                                                                                   |
| Mus musculus | Cluster -425 | Acaa2          | 3-ketoacyl-CoA thiolase, mitochondrial                                                                                      |
| Mus musculus | Cluster -425 | Ahnak          | N/A                                                                                                                         |
| Mus musculus | Cluster -425 | 9030617003 Rik | UPF0317 protein C14orf159 homolog, mitochondrial                                                                            |
| Mus musculus | Cluster -425 | Sucla2         | Succinyl-CoA ligase [ADP-forming] subunit beta, mitochondrial                                                               |
| Mus musculus | Cluster -425 | Ak3            | GTP:AMP phosphotransferase AK3, mitochondrial                                                                               |
| Mus musculus | Cluster -425 | Slc3a2         | 4F2 cell-surface antigen heavy chain                                                                                        |
| Mus          | Cluster -425 | Uba1;Uba1y     | Ubiquitin-like modifier-activating enzyme 1;Ubiquitin-like                                                                  |

|              |              |               |                                                                                                                                                                                        |
|--------------|--------------|---------------|----------------------------------------------------------------------------------------------------------------------------------------------------------------------------------------|
| musculus     |              |               | modifier-activating enzyme 1 Y                                                                                                                                                         |
| Mus musculus | Cluster -425 | Swap70        | Switch-associated protein 70                                                                                                                                                           |
| Mus musculus | Cluster -425 | Ehd2          | EH domain-containing protein 2                                                                                                                                                         |
| Mus musculus | Cluster -425 | Ttl4          | Tubulin polyglutamylase TTL4                                                                                                                                                           |
| Mus musculus | Cluster -425 | Wars          | Tryptophan--tRNA ligase, cytoplasmic;T1-TrpRS;T2-TrpRS                                                                                                                                 |
| Mus musculus | Cluster -425 | S100a10       | Protein S100-A10                                                                                                                                                                       |
| Mus musculus | Cluster -425 | Loxl4         | Lysyl oxidase homolog 4                                                                                                                                                                |
| Mus musculus | Cluster -425 | Stat1         | Signal transducer and activator of transcription;Signal transducer and activator of transcription 1                                                                                    |
| Mus musculus | Cluster -425 | Anxa3         | Annexin;Annexin A3                                                                                                                                                                     |
| Mus musculus | Cluster -425 | Carkd         | ATP-dependent (S)-NAD(P)H-hydrate dehydratase                                                                                                                                          |
| Mus musculus | Cluster -425 | Aldh2         | Aldehyde dehydrogenase, mitochondrial                                                                                                                                                  |
| Mus musculus | Cluster -425 | Psm3          | 26S proteasome non-ATPase regulatory subunit 3                                                                                                                                         |
| Bos taurus   | Cluster -425 | N/A           | N/A                                                                                                                                                                                    |
| Mus musculus | Cluster -425 | Ero11         | ERO1-like protein alpha                                                                                                                                                                |
| Mus musculus | Cluster -425 | Dad1          | Dolichyl-diphosphooligosaccharide--protein glycosyltransferase subunit DAD1                                                                                                            |
| Mus musculus | Cluster -425 | Por           | NADPH--cytochrome P450 reductase                                                                                                                                                       |
| Mus musculus | Cluster -425 | Hyal2         | Hyaluronidase-2                                                                                                                                                                        |
| Mus musculus | Cluster -425 | Tgm2          | Protein-glutamine gamma-glutamyltransferase 2                                                                                                                                          |
| Mus musculus | Cluster -425 | Bst2          | Bone marrow stromal antigen 2                                                                                                                                                          |
| Mus musculus | Cluster -425 | Sptbn1        | Spectrin beta chain, non-erythrocytic 1                                                                                                                                                |
| Mus musculus | Cluster -425 | Plau          | Urokinase-type plasminogen activator;Urokinase-type plasminogen activator chain B;Urokinase-type plasminogen activator long chain A;Urokinase-type plasminogen activator short chain A |
| Mus musculus | Cluster -425 | Nans          | N/A                                                                                                                                                                                    |
| Mus musculus | Cluster -425 | Adpgk         | ADP-dependent glucokinase                                                                                                                                                              |
| Mus musculus | Cluster -425 | Prdx5         | Peroxiredoxin-5, mitochondrial                                                                                                                                                         |
| Mus musculus | Cluster -425 | Atpif1        | ATPase inhibitor, mitochondrial                                                                                                                                                        |
| Mus musculus | Cluster -425 | Ifitm2;Ifitm3 | Interferon-induced transmembrane protein 2;Interferon-induced transmembrane protein 3                                                                                                  |
| Mus musculus | Cluster -425 | Tmem43        | Transmembrane protein 43                                                                                                                                                               |
| Mus          | Cluster -425 | Eef1d         | Elongation factor 1-delta                                                                                                                                                              |

|              |              |                |                                                                                                                                                                     |
|--------------|--------------|----------------|---------------------------------------------------------------------------------------------------------------------------------------------------------------------|
| musculus     |              |                |                                                                                                                                                                     |
| Mus musculus | Cluster -425 | Ctnnd1         | Catenin delta-1                                                                                                                                                     |
| Mus musculus | Cluster -425 | Clic1          | Chloride intracellular channel protein 1                                                                                                                            |
| Mus musculus | Cluster -425 | Flnb           | Filamin-B                                                                                                                                                           |
| Mus musculus | Cluster -425 | Fam129b        | Niban-like protein 1                                                                                                                                                |
| Mus musculus | Cluster -425 | M6pr           | Cation-dependent mannose-6-phosphate receptor                                                                                                                       |
| Mus musculus | Cluster -425 | Dstn           | Destrin                                                                                                                                                             |
| Mus musculus | Cluster -425 | Bst1           | ADP-ribosyl cyclase/cyclic ADP-ribose hydrolase 2                                                                                                                   |
| Mus musculus | Cluster -425 | Ganab          | Neutral alpha-glucosidase AB                                                                                                                                        |
| Mus musculus | Cluster -425 | 2200002D01 Rik | N/A                                                                                                                                                                 |
| Bos taurus   | Cluster -425 | N/A            | N/A                                                                                                                                                                 |
| Mus musculus | Cluster -425 | H2-D1;H2-L     | H-2 class I histocompatibility antigen, D-B alpha chain;H-2 class I histocompatibility antigen, L-D alpha chain;H-2 class I histocompatibility antigen, alpha chain |
| Mus musculus | Cluster -425 | Tkt            | Transketolase                                                                                                                                                       |
| Mus musculus | Cluster -425 | Sod1           | Superoxide dismutase [Cu-Zn]                                                                                                                                        |
| Mus musculus | Cluster -425 | Ppia           | Peptidyl-prolyl cis-trans isomerase A;Peptidyl-prolyl cis-trans isomerase A, N-terminally processed                                                                 |
| Mus musculus | Cluster -425 | G6pdx;G6pd 2   | Glucose-6-phosphate 1-dehydrogenase X;Glucose-6-phosphate 1-dehydrogenase;Glucose-6-phosphate 1-dehydrogenase 2                                                     |
| Mus musculus | Cluster -425 | Bid            | BH3-interacting domain death agonist;BH3-interacting domain death agonist p15;BH3-interacting domain death agonist p13;BH3-interacting domain death agonist p11     |
| Bos taurus   | Cluster -425 | N/A            | N/A                                                                                                                                                                 |
| Mus musculus | Cluster -425 | Ak4            | Adenylate kinase 4, mitochondrial                                                                                                                                   |
| Mus musculus | Cluster -425 | Icam2          | Intercellular adhesion molecule 2                                                                                                                                   |
| Mus musculus | Cluster -425 | Pfkl           | ATP-dependent 6-phosphofructokinase, liver type                                                                                                                     |
| Mus musculus | Cluster -425 | Atp1b3         | Sodium/potassium-transporting ATPase subunit beta-3                                                                                                                 |
| Mus musculus | Cluster -425 | Decr1          | 2,4-dienoyl-CoA reductase, mitochondrial                                                                                                                            |
| Mus musculus | Cluster -425 | Myof           | Myoferlin                                                                                                                                                           |
| Mus musculus | Cluster -425 | Zmpste24       | CAAX prenyl protease 1 homolog                                                                                                                                      |
| Mus musculus | Cluster -425 | Hspg2          | Basement membrane-specific heparan sulfate proteoglycan core protein;Endorepellin;LG3 peptide                                                                       |
| Mus musculus | Cluster -425 | Uqcrc2         | Cytochrome b-c1 complex subunit 2, mitochondrial                                                                                                                    |
| Mus          | Cluster -425 | Anxa7          | Annexin A7                                                                                                                                                          |

|              |              |          |                                                                                                                                                            |
|--------------|--------------|----------|------------------------------------------------------------------------------------------------------------------------------------------------------------|
| musculus     |              |          |                                                                                                                                                            |
| Mus musculus | Cluster -425 | Cyc1     | Cytochrome c1, heme protein, mitochondrial                                                                                                                 |
| Bos taurus   | Cluster -425 | N/A      | Mitochondrial inner membrane protease ATP23 {ECO:0000256 RuleBase:RU364057}                                                                                |
| Mus musculus | Cluster -425 | Atp5o    | ATP synthase subunit O, mitochondrial                                                                                                                      |
| Bos taurus   | Cluster -425 | RXFP2    | N/A                                                                                                                                                        |
| Mus musculus | Cluster -425 | Ogdh     | 2-oxoglutarate dehydrogenase, mitochondrial                                                                                                                |
| Bos taurus   | Cluster -425 | DDX11    | N/A                                                                                                                                                        |
| Mus musculus | Cluster -425 | mt-Co3   | Cytochrome c oxidase subunit 3                                                                                                                             |
| Mus musculus | Cluster -425 | Cyb5r3   | NADH-cytochrome b5 reductase 3;NADH-cytochrome b5 reductase 3 membrane-bound form;NADH-cytochrome b5 reductase 3 soluble form;NADH-cytochrome b5 reductase |
| Mus musculus | Cluster -425 | Pkm      | Pyruvate kinase PKM                                                                                                                                        |
| Bos taurus   | Cluster -425 | TF       | Serotransferrin                                                                                                                                            |
| Mus musculus | Cluster -425 | Stom     | Erythrocyte band 7 integral membrane protein                                                                                                               |
| Mus musculus | Cluster -425 | Pecam1   | Platelet endothelial cell adhesion molecule                                                                                                                |
| Mus musculus | Cluster -425 | Cep290   | Centrosomal protein of 290 kDa                                                                                                                             |
| Mus musculus | Cluster -425 | Suclg1   | Succinyl-CoA ligase [ADP/GDP-forming] subunit alpha, mitochondrial                                                                                         |
| Mus musculus | Cluster -425 | Cox7a2   | Cytochrome c oxidase subunit 7A2, mitochondrial                                                                                                            |
| Mus musculus | Cluster -425 | C1qbp    | Complement component 1 Q subcomponent-binding protein, mitochondrial                                                                                       |
| Mus musculus | Cluster -425 | Bcap31   | B-cell receptor-associated protein 31                                                                                                                      |
| Mus musculus | Cluster -425 | Idh2     | Isocitrate dehydrogenase [NADP], mitochondrial                                                                                                             |
| Mus musculus | Cluster -425 | Cyb5b    | Cytochrome b5 type B                                                                                                                                       |
| Mus musculus | Cluster -425 | Hadh     | Hydroxyacyl-coenzyme A dehydrogenase, mitochondrial                                                                                                        |
| Mus musculus | Cluster -425 | P4hb     | Protein disulfide-isomerase                                                                                                                                |
| Mus musculus | Cluster -425 | Canx     | Calnexin                                                                                                                                                   |
| Mus musculus | Cluster -425 | Atp6v0d1 | V-type proton ATPase subunit d 1                                                                                                                           |
| Bos taurus   | Cluster -425 | N/A      | N/A                                                                                                                                                        |
| Mus musculus | Cluster -425 | Glud1    | Glutamate dehydrogenase 1, mitochondrial                                                                                                                   |
| Mus musculus | Cluster -425 | Klhl26   | Kelch-like protein 26                                                                                                                                      |
| Mus musculus | Cluster -425 | Ehd1     | EH domain-containing protein 1                                                                                                                             |
| Mus          | Cluster -425 | Hspd1    | 60 kDa heat shock protein, mitochondrial                                                                                                                   |

|              |              |         |                                                                                             |
|--------------|--------------|---------|---------------------------------------------------------------------------------------------|
| musculus     |              |         |                                                                                             |
| Mus musculus | Cluster -425 | Acadl   | Long-chain specific acyl-CoA dehydrogenase, mitochondrial                                   |
| Mus musculus | Cluster -425 | Tsfm    | Elongation factor Ts, mitochondrial                                                         |
| Mus musculus | Cluster -425 | Rtn4    | Reticulon-4                                                                                 |
| Mus musculus | Cluster -425 | Aco2    | Aconitate hydratase, mitochondrial                                                          |
| Mus musculus | Cluster -425 | Ctsd    | Cathepsin D                                                                                 |
| Mus musculus | Cluster -425 | Tmed10  | Transmembrane emp24 domain-containing protein 10                                            |
| Mus musculus | Cluster -425 | Ece1    | Endothelin-converting enzyme 1                                                              |
| Mus musculus | Cluster -425 | Rpl14   | 60S ribosomal protein L14                                                                   |
| Mus musculus | Cluster -425 | Myh9    | Myosin-9                                                                                    |
| Mus musculus | Cluster -425 | Eef2    | Elongation factor 2                                                                         |
| Mus musculus | Cluster -425 | Anxa1   | Annexin A1                                                                                  |
| Mus musculus | Cluster -425 | Pebp1   | Phosphatidylethanolamine-binding protein 1;Hippocampal cholinergic neurostimulating peptide |
| Mus musculus | Cluster -425 | Anxa6   | Annexin;Annexin A6                                                                          |
| Mus musculus | Cluster -425 | Maoa    | Amine oxidase [flavin-containing] A                                                         |
| Mus musculus | Cluster -425 | Calu    | Calumenin                                                                                   |
| Mus musculus | Cluster -425 | Capg    | Macrophage-capping protein                                                                  |
| Mus musculus | Cluster -425 | Uqcrq   | Cytochrome b-c1 complex subunit 8                                                           |
| Mus musculus | Cluster -425 | Cd34    | Hematopoietic progenitor cell antigen CD34                                                  |
| Mus musculus | Cluster -425 | Cyb5a   | Cytochrome b5                                                                               |
| Mus musculus | Cluster -425 | Sod2    | Superoxide dismutase [Mn], mitochondrial                                                    |
| Mus musculus | Cluster -425 | Rpn2    | Dolichyl-diphosphooligosaccharide--protein glycosyltransferase subunit 2                    |
| Mus musculus | Cluster -425 | Pik3c2g | Phosphatidylinositol 4-phosphate 3-kinase C2 domain-containing subunit gamma                |
| Mus musculus | Cluster -425 | Adgrf5  | N/A                                                                                         |
| Mus musculus | Cluster -425 | Idh3g   | Isocitrate dehydrogenase [NAD] subunit gamma 1, mitochondrial                               |
| Mus musculus | Cluster -425 | Acot7   | Cytosolic acyl coenzyme A thioester hydrolase                                               |
| Mus musculus | Cluster -425 | Sis     | N/A                                                                                         |
| Mus          | Cluster -425 | Ephx1   | Epoxide hydrolase 1                                                                         |



|              |              |          |                                                                            |
|--------------|--------------|----------|----------------------------------------------------------------------------|
| musculus     |              |          |                                                                            |
| Mus musculus | Cluster -425 | Calr     | Calreticulin                                                               |
| Mus musculus | Cluster -425 | Uqerb    | Cytochrome b-c1 complex subunit 7                                          |
| Mus musculus | Cluster -425 | Rpn1     | Dolichyl-diphosphooligosaccharide--protein glycosyltransferase subunit 1   |
| Mus musculus | Cluster -425 | Rps3a    | 40S ribosomal protein S3a                                                  |
| Mus musculus | Cluster -425 | Hsp90aa1 | Heat shock protein HSP 90-alpha                                            |
| Mus musculus | Cluster -425 | Gpi      | Glucose-6-phosphate isomerase                                              |
| Mus musculus | Cluster -425 | Actn1    | Alpha-actinin-1                                                            |
| Mus musculus | Cluster -425 | Hint1    | Histidine triad nucleotide-binding protein 1                               |
| Mus musculus | Cluster -425 | Prkcsh   | Glucosidase 2 subunit beta                                                 |
| Mus musculus | Cluster -425 | Podxl    | Podocalyxin                                                                |
| Mus musculus | Cluster -425 | Hpcal1   | Hippocalcin-like protein 1                                                 |
| Mus musculus | Cluster -425 | Nos3     | Nitric oxide synthase, endothelial;Nitric oxide synthase                   |
| Mus musculus | Cluster -425 | Atp5c1   | ATP synthase subunit gamma;ATP synthase subunit gamma, mitochondrial       |
| Mus musculus | Cluster -425 | Pfn1     | Profilin-1                                                                 |
| Mus musculus | Cluster -425 | Alpl     | Alkaline phosphatase;Alkaline phosphatase, tissue-nonspecific isozyme      |
| Mus musculus | Cluster -425 | Gdi2     | Rab GDP dissociation inhibitor beta                                        |
| Mus musculus | Cluster -425 | Cnih4    | Protein cornichon homolog 4                                                |
| Mus musculus | Cluster -425 | Hadhb    | 3-ketoacyl-CoA thiolase;Trifunctional enzyme subunit beta, mitochondrial   |
| Mus musculus | Cluster -425 | Uqcrc1   | Cytochrome b-c1 complex subunit 1, mitochondrial                           |
| Mus musculus | Cluster -425 | Itgav    | Integrin alpha-V;Integrin alpha-V heavy chain;Integrin alpha-V light chain |
| Mus musculus | Cluster -425 | Clec4a3  | N/A                                                                        |
| Mus musculus | Cluster -425 | Atp5j2   | ATP synthase subunit f, mitochondrial                                      |
| Mus musculus | Cluster -425 | Ndufb8   | NADH dehydrogenase [ubiquinone] 1 beta subcomplex subunit 8, mitochondrial |
| Mus musculus | Cluster -425 | Serpine1 | Plasminogen activator inhibitor 1                                          |
| Mus musculus | Cluster -425 | Rpl6     | 60S ribosomal protein L6                                                   |
| Mus musculus | Cluster -425 | Lonp1    | Lon protease homolog, mitochondrial                                        |
| Mus          | Cluster -425 | Rpl3     | 60S ribosomal protein L3                                                   |

|              |              |                                               |                                                                                                |
|--------------|--------------|-----------------------------------------------|------------------------------------------------------------------------------------------------|
| musculus     |              |                                               |                                                                                                |
| Mus musculus | Cluster -425 | Atp5f1                                        | ATP synthase F(0) complex subunit B1, mitochondrial                                            |
| Mus musculus | Cluster -425 | Rars                                          | Arginine--tRNA ligase, cytoplasmic                                                             |
| Mus musculus | Cluster -425 | Aldh18a1                                      | Delta-1-pyrroline-5-carboxylate synthase;Gamma-glutamyl phosphate reductase;Glutamate 5-kinase |
| Mus musculus | Cluster -425 | Cav2                                          | Caveolin;Caveolin-2                                                                            |
| Mus musculus | Cluster -425 | Rpl5                                          | 60S ribosomal protein L5                                                                       |
| Mus musculus | Cluster -425 | Nedd4                                         | E3 ubiquitin-protein ligase NEDD4                                                              |
| Mus musculus | Cluster -425 | Ubr4                                          | E3 ubiquitin-protein ligase UBR4                                                               |
| Mus musculus | Cluster -425 | Top2a                                         | DNA topoisomerase 2-alpha                                                                      |
| Mus musculus | Cluster -425 | Prcp                                          | Lysosomal Pro-X carboxypeptidase                                                               |
| Mus musculus | Cluster -425 | Pgd                                           | 6-phosphogluconate dehydrogenase, decarboxylating                                              |
| Mus musculus | Cluster -425 | Sqrdl                                         | Sulfide:quinone oxidoreductase, mitochondrial                                                  |
| Mus musculus | Cluster -425 | Esd                                           | S-formylglutathione hydrolase                                                                  |
| Mus musculus | Cluster -420 | Dpysl3                                        | Dihydropyrimidinase-related protein 3                                                          |
| Mus musculus | Cluster -420 | Pdhx                                          | Pyruvate dehydrogenase protein X component, mitochondrial                                      |
| Mus musculus | Cluster -420 | Ncapg                                         | N/A                                                                                            |
| Mus musculus | Cluster -420 | Cdc42bpb                                      | Serine/threonine-protein kinase MRCK beta                                                      |
| Mus musculus | Cluster -420 | Tapbp                                         | Tapasin                                                                                        |
| Mus musculus | Cluster -420 | Pdia6                                         | Protein disulfide-isomerase A6                                                                 |
| Bos taurus   | Cluster -420 | N/A                                           | N/A                                                                                            |
| Mus musculus | Cluster -420 | Iars                                          | Isoleucine--tRNA ligase, cytoplasmic                                                           |
| Mus musculus | Cluster -420 | Pvr                                           | N/A                                                                                            |
| Mus musculus | Cluster -420 | Gsto1                                         | Glutathione S-transferase omega-1                                                              |
| Mus musculus | Cluster -420 | Ugt2b1;Ugt2b35;Ugt2b38;Ugt2b37;Ugt2b5;Ugt2b17 | UDP-glucuronosyltransferase 2B17                                                               |
| Mus musculus | Cluster -420 | Itga3                                         | Integrin alpha-3;Integrin alpha-3 heavy chain;Integrin alpha-3 light chain                     |
| Mus musculus | Cluster -420 | Plod2                                         | Procollagen-lysine,2-oxoglutarate 5-dioxygenase 2                                              |
| Mus          | Cluster -420 | Hspa5                                         | 78 kDa glucose-regulated protein                                                               |

|              |              |                 |                                                                              |
|--------------|--------------|-----------------|------------------------------------------------------------------------------|
| musculus     |              |                 |                                                                              |
| Mus musculus | Cluster -420 | Arsb            | Arylsulfatase B                                                              |
| Mus musculus | Cluster -420 | Pnpla6          | Neuropathy target esterase                                                   |
| Mus musculus | Cluster -420 | Gaa             | Lysosomal alpha-glucosidase                                                  |
| Mus musculus | Cluster -420 | Ndufa5          | NADH dehydrogenase [ubiquinone] 1 alpha subcomplex subunit 5                 |
| Mus musculus | Cluster -420 | Them6           | Protein THEM6                                                                |
| Mus musculus | Cluster -420 | Hsph1           | Heat shock protein 105 kDa                                                   |
| Mus musculus | Cluster -420 | Mecr            | Trans-2-enoyl-CoA reductase, mitochondrial                                   |
| Mus musculus | Cluster -420 | Dnaja3          | N/A                                                                          |
| Mus musculus | Cluster -420 | Ano6            | Anoctamin-6                                                                  |
| Mus musculus | Cluster -420 | Irgm1           | Immunity-related GTPase family M protein 1                                   |
| Mus musculus | Cluster -420 | Scamp2          | Secretory carrier-associated membrane protein 2                              |
| Mus musculus | Cluster -420 | Mp68            | 6.8 kDa mitochondrial proteolipid                                            |
| Mus musculus | Cluster -420 | Erp44           | Endoplasmic reticulum resident protein 44                                    |
| Mus musculus | Cluster -420 | Ppa2            | Inorganic pyrophosphatase 2, mitochondrial                                   |
| Mus musculus | Cluster -420 | Hk2             | Hexokinase;Hexokinase-2                                                      |
| Mus musculus | Cluster -420 | Cox5b           | Cytochrome c oxidase subunit 5B, mitochondrial                               |
| Mus musculus | Cluster -420 | Lbp             | Lipopolysaccharide-binding protein                                           |
| Mus musculus | Cluster -420 | Pck2            | Phosphoenolpyruvate carboxykinase [GTP], mitochondrial                       |
| Mus musculus | Cluster -420 | Itpa            | Inosine triphosphate pyrophosphatase                                         |
| Mus musculus | Cluster -420 | Lrpprc          | Leucine-rich PPR motif-containing protein, mitochondrial                     |
| Mus musculus | Cluster -420 | Lamp2           | Lysosome-associated membrane glycoprotein 2                                  |
| Mus musculus | Cluster -420 | Mpst            | 3-mercaptopyruvate sulfurtransferase                                         |
| Mus musculus | Cluster -420 | Cpn10-rs1;Hspe1 | 10 kDa heat shock protein, mitochondrial                                     |
| Mus musculus | Cluster -420 | Ndufa3          | NADH dehydrogenase [ubiquinone] 1 alpha subcomplex subunit 3                 |
| Mus musculus | Cluster -420 | Stt3b           | Dolichyl-diphosphooligosaccharide--protein glycosyltransferase subunit STT3B |
| Mus musculus | Cluster -420 | Dnaja3          | DnaJ homolog subfamily A member 3, mitochondrial                             |
| Mus          | Cluster -420 | Mrps34          | 28S ribosomal protein S34, mitochondrial                                     |

|              |              |                   |                                                                                                                                                                                                                                                                                                                                 |
|--------------|--------------|-------------------|---------------------------------------------------------------------------------------------------------------------------------------------------------------------------------------------------------------------------------------------------------------------------------------------------------------------------------|
| musculus     |              |                   |                                                                                                                                                                                                                                                                                                                                 |
| Mus musculus | Cluster -420 | Hsd17b4           | Peroxisomal multifunctional enzyme type 2;(3R)-hydroxyacyl-CoA dehydrogenase;Enoyl-CoA hydratase 2                                                                                                                                                                                                                              |
| Mus musculus | Cluster -420 | Dync1h1           | Cytoplasmic dynein 1 heavy chain 1                                                                                                                                                                                                                                                                                              |
| Mus musculus | Cluster -420 | Gsta1;Gsta2;Gsta3 | Glutathione S-transferase;Glutathione S-transferase A1;Glutathione S-transferase A1, N-terminally processed;Glutathione S-transferase A3;Glutathione S-transferase A2                                                                                                                                                           |
| Mus musculus | Cluster -420 | Ecm1              | Extracellular matrix protein 1                                                                                                                                                                                                                                                                                                  |
| Mus musculus | Cluster -420 | Ide               | Insulin-degrading enzyme                                                                                                                                                                                                                                                                                                        |
| Mus musculus | Cluster -420 | Itga2             | Integrin alpha-2                                                                                                                                                                                                                                                                                                                |
| Mus musculus | Cluster -420 | Ccdc90b           | Coiled-coil domain-containing protein 90B, mitochondrial                                                                                                                                                                                                                                                                        |
| Mus musculus | Cluster -420 | Dpp3              | Dipeptidyl peptidase 3                                                                                                                                                                                                                                                                                                          |
| Mus musculus | Cluster -420 | Immt              | MICOS complex subunit Mic60                                                                                                                                                                                                                                                                                                     |
| Mus musculus | Cluster -420 | Lrrc32            | N/A                                                                                                                                                                                                                                                                                                                             |
| Mus musculus | Cluster -420 | Synj2bp           | Synaptojanin-2-binding protein                                                                                                                                                                                                                                                                                                  |
| Mus musculus | Cluster -420 | Krt76             | Keratin, type II cytoskeletal 2 oral                                                                                                                                                                                                                                                                                            |
| Mus musculus | Cluster -420 | Mthfd2            | Bifunctional methylenetetrahydrofolate dehydrogenase/cyclohydrolase, mitochondrial;NAD-dependent methylenetetrahydrofolate dehydrogenase;Methenyltetrahydrofolate cyclohydrolase                                                                                                                                                |
| Mus musculus | Cluster -420 | Trap1             | Heat shock protein 75 kDa, mitochondrial                                                                                                                                                                                                                                                                                        |
| Mus musculus | Cluster -420 | Hexb              | Beta-hexosaminidase subunit beta                                                                                                                                                                                                                                                                                                |
| Mus musculus | Cluster -420 | Scp2              | Non-specific lipid-transfer protein                                                                                                                                                                                                                                                                                             |
| Mus musculus | Cluster -420 | Acot13            | Acyl-coenzyme A thioesterase 13;Acyl-coenzyme A thioesterase 13, N-terminally processed                                                                                                                                                                                                                                         |
| Mus musculus | Cluster -420 | Fasn              | Fatty acid synthase;[Acyl-carrier-protein] S-acetyltransferase;[Acyl-carrier-protein] S-malonyltransferase;3-oxoacyl-[acyl-carrier-protein] synthase;3-oxoacyl-[acyl-carrier-protein] reductase;3-hydroxyacyl-[acyl-carrier-protein] dehydratase;Enoyl-[acyl-carrier-protein] reductase;Oleoyl-[acyl-carrier-protein] hydrolase |
| Mus musculus | Cluster -420 | N/A               | Uncharacterized protein C17orf62 homolog                                                                                                                                                                                                                                                                                        |
| Mus musculus | Cluster -420 | Tbcb              | Tubulin-folding cofactor B                                                                                                                                                                                                                                                                                                      |
| Mus musculus | Cluster -420 | Copa              | Coatomer subunit alpha;Proxenin;Xenin                                                                                                                                                                                                                                                                                           |
| Mus musculus | Cluster -420 | Cdk18             | Cyclin-dependent kinase 18                                                                                                                                                                                                                                                                                                      |
| Mus musculus | Cluster -420 | Coasy             | Bifunctional coenzyme A synthase;Phosphopantetheine adenylyltransferase;Dephospho-CoA kinase                                                                                                                                                                                                                                    |

|              |              |          |                                                                                |
|--------------|--------------|----------|--------------------------------------------------------------------------------|
| Mus musculus | Cluster -420 | Slc25a24 | Calcium-binding mitochondrial carrier protein SCaMC-1                          |
| Mus musculus | Cluster -420 | Cd38     | ADP-ribosyl cyclase/cyclic ADP-ribose hydrolase 1                              |
| Mus musculus | Cluster -420 | Spryd4   | SPRY domain-containing protein 4                                               |
| Mus musculus | Cluster -420 | Txnrd1   | Thioredoxin reductase 1, cytoplasmic                                           |
| Mus musculus | Cluster -420 | Apmap    | Adipocyte plasma membrane-associated protein                                   |
| Mus musculus | Cluster -420 | Psmel    | Proteasome activator complex subunit 1                                         |
| Mus musculus | Cluster -420 | Eif5b    | Eukaryotic translation initiation factor 5B                                    |
| Mus musculus | Cluster -420 | Farsb    | Phenylalanine--tRNA ligase beta subunit                                        |
| Mus musculus | Cluster -420 | Gbe1     | 1,4-alpha-glucan-branching enzyme                                              |
| Mus musculus | Cluster -420 | Akr7a2   | Aflatoxin B1 aldehyde reductase member 2                                       |
| Mus musculus | Cluster -420 | Fkbp9    | Peptidyl-prolyl cis-trans isomerase FKBP9                                      |
| Mus musculus | Cluster -420 | Dnm3     | Dynamin-3                                                                      |
| Mus musculus | Cluster -420 | Atp5j    | ATP synthase-coupling factor 6, mitochondrial                                  |
| Mus musculus | Cluster -420 | N/A      | N/A                                                                            |
| Mus musculus | Cluster -420 | Rnf213   | E3 ubiquitin-protein ligase RNF213                                             |
| Mus musculus | Cluster -420 | Itsn2    | N/A                                                                            |
| Mus musculus | Cluster -420 | Mars     | Methionine--tRNA ligase, cytoplasmic                                           |
| Mus musculus | Cluster -420 | Tmtc3    | Transmembrane and TPR repeat-containing protein 3                              |
| Mus musculus | Cluster -420 | Usp14    | Ubiquitin carboxyl-terminal hydrolase;Ubiquitin carboxyl-terminal hydrolase 14 |
| Mus musculus | Cluster -420 | Icam1    | Intercellular adhesion molecule 1                                              |
| Mus musculus | Cluster -420 | Nomo1    | Nodal modulator 1                                                              |
| Mus musculus | Cluster -420 | Casp3    | Caspase-3;Caspase-3 subunit p17;Caspase-3 subunit p12                          |
| Mus musculus | Cluster -420 | Pgrmc2   | Membrane-associated progesterone receptor component 2                          |
| Mus musculus | Cluster -420 | Brcc3    | Lys-63-specific deubiquitinase BRCC36                                          |
| Mus musculus | Cluster -420 | Gstz1    | Maleylacetoacetate isomerase                                                   |
| Mus musculus | Cluster -420 | Plin2    | Perilipin-2                                                                    |
| Mus musculus | Cluster -420 | Atp1a1   | Sodium/potassium-transporting ATPase subunit alpha-1                           |

|              |              |             |                                                                                                   |
|--------------|--------------|-------------|---------------------------------------------------------------------------------------------------|
| Mus musculus | Cluster -420 | Hnrnpul2    | Heterogeneous nuclear ribonucleoprotein U-like protein 2                                          |
| Mus musculus | Cluster -420 | Copg1       | Coatomer subunit gamma-1                                                                          |
| Mus musculus | Cluster -420 | Rdh11       | Retinol dehydrogenase 11                                                                          |
| Mus musculus | Cluster -420 | Nucb2       | Nesfatin-1;Nucleobindin-2                                                                         |
| Mus musculus | Cluster -420 | Lgals1      | Galectin-1                                                                                        |
| Mus musculus | Cluster -420 | Acsf2       | Acyl-CoA synthetase family member 2, mitochondrial                                                |
| Mus musculus | Cluster -420 | Mlk1        | Mixed lineage kinase domain-like protein                                                          |
| Mus musculus | Cluster -420 | Atad3       | ATPase family AAA domain-containing protein 3                                                     |
| Mus musculus | Cluster -420 | Cbr1        | Carbonyl reductase [NADPH] 1                                                                      |
| Mus musculus | Cluster -420 | Palld       | Palladin                                                                                          |
| Mus musculus | Cluster -420 | Atp2a2      | Sarcoplasmic/endoplasmic reticulum calcium ATPase 2                                               |
| Mus musculus | Cluster -420 | Lta4h       | Leukotriene A-4 hydrolase                                                                         |
| Mus musculus | Cluster -420 | Uchl3;Uchl4 | Ubiquitin carboxyl-terminal hydrolase isozyme L3;Ubiquitin carboxyl-terminal hydrolase isozyme L4 |
| Mus musculus | Cluster -420 | Caskin2     | Caskin-2                                                                                          |
| Mus musculus | Cluster -420 | Dctn1       | Dynactin subunit 1                                                                                |
| Bos taurus   | Cluster -420 | LOX         | Protein-lysine 6-oxidase                                                                          |

**Table S2.** Proteins exclusive of LMNV-PC exposed just to FBS without the passage through the BBB.

| <b>Taxonomy</b> | <b>Cluster</b> | <b>Gene name</b> | <b>Uniprot full protein name</b>                                                         |
|-----------------|----------------|------------------|------------------------------------------------------------------------------------------|
| C               | C              | T                | T                                                                                        |
| Bos taurus      | Cluster 10     | N/A              | N/A                                                                                      |
| Bos taurus      | Cluster 139    | N/A              | N/A                                                                                      |
| Bos taurus      | Cluster -321   | ACE              | Angiotensin-converting enzyme {ECO:0000256 RuleBase:RU361144}                            |
| Bos taurus      | Cluster -321   | N/A              | Tetraspanin {ECO:0000256 RuleBase:RU361218}                                              |
| Bos taurus      | Cluster -321   | N/A              | N/A                                                                                      |
| Bos taurus      | Cluster -321   | N/A              | N/A                                                                                      |
| Bos taurus      | Cluster -321   | FTL;LOC783993    | Ferritin {ECO:0000256 RuleBase:RU361145};Ferritin light chain                            |
| Bos taurus      | Cluster -321   | N/A              | N/A                                                                                      |
| Bos taurus      | Cluster -321   | N/A              | N/A                                                                                      |
| Bos taurus      | Cluster -321   | HSPB1            | Heat shock protein beta-1                                                                |
| Bos taurus      | Cluster -321   | UGP2             | UTP--glucose-1-phosphate uridylyltransferase                                             |
| Bos taurus      | Cluster -321   | SULT1A1          | Sulfotransferase 1A1                                                                     |
| Bos taurus      | Cluster -321   | N/A              | N/A                                                                                      |
| Bos taurus      | Cluster -321   | CTSC             | Dipeptidyl peptidase 1                                                                   |
| Bos taurus      | Cluster -321   | CD97             | CD97 antigen                                                                             |
| Bos taurus      | Cluster -321   | GPD1             | Glycerol-3-phosphate dehydrogenase [NAD(+)], cytoplasmic                                 |
| Bos taurus      | Cluster -321   | CTSA             | Lysosomal protective protein                                                             |
| Bos taurus      | Cluster -321   | QPCT             | Glutaminy-peptide cyclotransferase                                                       |
| Bos taurus      | Cluster -321   | HAGH             | Hydroxyacylglutathione hydrolase, mitochondrial                                          |
| Bos taurus      | Cluster -321   | AKR7A2           | N/A                                                                                      |
| Bos taurus      | Cluster -321   | CHGB             | Secretogranin-1                                                                          |
| Bos taurus      | Cluster -321   | FABP1            | Fatty acid-binding protein, liver                                                        |
| Bos taurus      | Cluster -321   | N/A              | N/A                                                                                      |
| Bos taurus      | Cluster -321   | DMXL2            | N/A                                                                                      |
| Bos taurus      | Cluster -321   | ISLR             | Immunoglobulin superfamily containing leucine-rich repeat protein                        |
| Bos taurus      | Cluster -321   | APCS             | Serum amyloid P-component                                                                |
| Bos taurus      | Cluster -321   | F11              | Coagulation factor XI                                                                    |
| Bos taurus      | Cluster -321   | N/A              | Septin-2                                                                                 |
| Bos taurus      | Cluster -321   | CD109            | N/A                                                                                      |
| Bos taurus      | Cluster -321   | N/A              | N/A                                                                                      |
| Bos taurus      | Cluster -321   | N/A              | N/A                                                                                      |
| Bos taurus      | Cluster -321   | DDAH2            | N(G),N(G)-dimethylarginine dimethylaminohydrolase 2                                      |
| Bos taurus      | Cluster -321   | MAN2B1           | Lysosomal alpha-mannosidase                                                              |
| Bos taurus      | Cluster -321   | ASS1             | Argininosuccinate synthase {ECO:0000305}                                                 |
| Bos taurus      | Cluster -321   | CAPNS1           | Calpain small subunit 1                                                                  |
| Bos taurus      | Cluster -321   | N/A              | N/A                                                                                      |
| Bos taurus      | Cluster -321   | ME1              | Malic enzyme {ECO:0000256 RuleBase:RU003426}                                             |
| Bos taurus      | Cluster -321   | GSTM1;GSTM2      | Glutathione S-transferase {ECO:0000256 RuleBase:RU003494};Glutathione S-transferase Mu 1 |
| Bos taurus      | Cluster -321   | N/A              | N/A                                                                                      |

|            |              |                       |                                                                                                                  |
|------------|--------------|-----------------------|------------------------------------------------------------------------------------------------------------------|
| Bos taurus | Cluster -321 | N/A                   | alpha-1,2-Mannosidase {ECO:0000256 RuleBase:RU361193}                                                            |
| Bos taurus | Cluster -321 | CNTN1                 | Contactin-1                                                                                                      |
| Bos taurus | Cluster -321 | PROC                  | Vitamin K-dependent protein C                                                                                    |
| Bos taurus | Cluster -321 | N/A                   | N/A                                                                                                              |
| Bos taurus | Cluster -321 | ERP44                 | Endoplasmic reticulum resident protein 44                                                                        |
| Bos taurus | Cluster -321 | N/A                   | N/A                                                                                                              |
| Bos taurus | Cluster -321 | ESD                   | S-formylglutathione hydrolase                                                                                    |
| Bos taurus | Cluster -321 | N/A                   | N/A                                                                                                              |
| Bos taurus | Cluster -321 | FADD                  | FAS-associated death domain protein                                                                              |
| Bos taurus | Cluster -321 | ASL                   | Argininosuccinate lyase                                                                                          |
| Bos taurus | Cluster -321 | WDR1                  | WD repeat-containing protein 1                                                                                   |
| Bos taurus | Cluster -321 | LOC104968<br>478;SAA1 | Serum amyloid A protein;Serum amyloid A protein<br>{ECO:0000256 RuleBase:RU000539}                               |
| Bos taurus | Cluster -321 | N/A                   | N/A                                                                                                              |
| Bos taurus | Cluster -321 | N/A                   | N/A                                                                                                              |
| Bos taurus | Cluster -321 | PHGDH                 | D-3-phosphoglycerate dehydrogenase;D-3-phosphoglycerate<br>dehydrogenase {ECO:0000256 RuleBase:RU363003}         |
| Bos taurus | Cluster -321 | N/A                   | N/A                                                                                                              |
| Bos taurus | Cluster -321 | N/A                   | N/A                                                                                                              |
| Bos taurus | Cluster -321 | N/A                   | N/A                                                                                                              |
| Bos taurus | Cluster -321 | N/A                   | N/A                                                                                                              |
| Bos taurus | Cluster -321 | LAP3                  | Cytosol aminopeptidase                                                                                           |
| Bos taurus | Cluster -321 | N/A                   | N/A                                                                                                              |
| Bos taurus | Cluster -321 | N/A                   | N/A                                                                                                              |
| Bos taurus | Cluster -321 | CAT                   | Catalase                                                                                                         |
| Bos taurus | Cluster -321 | CDH5                  | Cadherin-5                                                                                                       |
| Bos taurus | Cluster -321 | ATP6AP2               | Renin receptor                                                                                                   |
| Bos taurus | Cluster -321 | MAT1A                 | S-adenosylmethionine synthase<br>{ECO:0000256 RuleBase:RU000541};S-adenosylmethionine<br>synthase isoform type-1 |
| Bos taurus | Cluster -321 | BANF1                 | Barrier-to-autointegration factor                                                                                |
| Bos taurus | Cluster -321 | C6                    | Complement component C6                                                                                          |
| Bos taurus | Cluster -321 | CALR                  | Calreticulin                                                                                                     |
| Bos taurus | Cluster -321 | ANP32B                | Acidic leucine-rich nuclear phosphoprotein 32 family member B                                                    |
| Bos taurus | Cluster -315 | PI16                  | Peptidase inhibitor 16                                                                                           |
| Bos taurus | Cluster -315 | SCG3                  | Secretogranin-3                                                                                                  |
| Bos taurus | Cluster -315 | ADAMTS13              | N/A                                                                                                              |
| Bos taurus | Cluster -315 | PNPO                  | Pyridoxine-5'-phosphate oxidase                                                                                  |
| Bos taurus | Cluster -315 | UMPS                  | Uridine 5'-monophosphate synthase                                                                                |
| Bos taurus | Cluster -315 | USP14                 | Ubiquitin carboxyl-terminal hydrolase 14                                                                         |
| Bos taurus | Cluster -315 | ACE2                  | Angiotensin-converting enzyme 2                                                                                  |
| Bos taurus | Cluster -315 | SUGT1                 | Protein SGT1 homolog {ECO:0000250 UniProtKB:Q08446}                                                              |
| Bos taurus | Cluster -315 | GSTP1                 | Glutathione S-transferase P                                                                                      |
| Bos taurus | Cluster -315 | N/A                   | Galectin {ECO:0000256 RuleBase:RU102079}                                                                         |
| Bos taurus | Cluster -315 | BASP1                 | Brain acid soluble protein 1                                                                                     |
| Bos taurus | Cluster -315 | ALPL                  | Alkaline phosphatase, tissue-nonspecific isozyme                                                                 |



|            |              |                    |                                                                                                                       |
|------------|--------------|--------------------|-----------------------------------------------------------------------------------------------------------------------|
| Bos taurus | Cluster -315 | BPGM;LOC 112447087 | Bisphosphoglycerate mutase;Phosphoglycerate mutase {ECO:0000256 RuleBase:RU004511}                                    |
| Bos taurus | Cluster -315 | PARK7              | Protein/nucleic acid deglycase DJ-1 {ECO:0000250 UniProtKB:Q99497}                                                    |
| Bos taurus | Cluster 46   | MMP2               | 72 kDa type IV collagenase                                                                                            |
| Bos taurus | Cluster -233 | KRT2               | N/A                                                                                                                   |
| Bos taurus | Cluster -319 | N/A                | N/A                                                                                                                   |
| Bos taurus | Cluster -319 | N/A                | N/A                                                                                                                   |
| Bos taurus | Cluster -319 | OGN                | Mimecan                                                                                                               |
| Bos taurus | Cluster -319 | N/A                | Fructose-bisphosphate aldolase {ECO:0000256 RuleBase:RU003994, ECO:0000256 SAAS:SAAS00336718}                         |
| Bos taurus | Cluster -319 | APOC2              | Apolipoprotein C-II                                                                                                   |
| Bos taurus | Cluster -319 | N/A                | N/A                                                                                                                   |
| Bos taurus | Cluster -319 | N/A                | N/A                                                                                                                   |
| Bos taurus | Cluster -319 | N/A                | N/A                                                                                                                   |
| Bos taurus | Cluster -319 | IDH1               | Isocitrate dehydrogenase [NADP] {ECO:0000256 PIRNR:PIRNR000108};Isocitrate dehydrogenase [NADP] cytoplasmic           |
| Bos taurus | Cluster -319 | S100A12            | Protein S100 {ECO:0000256 RuleBase:RU361184};Protein S100-A12                                                         |
| Bos taurus | Cluster -319 | N/A                | N/A                                                                                                                   |
| Bos taurus | Cluster -319 | RPLP2              | 60S acidic ribosomal protein P2                                                                                       |
| Bos taurus | Cluster -319 | HPRT1              | Hypoxanthine-guanine phosphoribosyltransferase                                                                        |
| Bos taurus | Cluster -319 | APOH               | Beta-2-glycoprotein 1                                                                                                 |
| Bos taurus | Cluster -319 | SORD               | Sorbitol dehydrogenase                                                                                                |
| Bos taurus | Cluster -319 | HBB                | Hemoglobin subunit beta                                                                                               |
| Bos taurus | Cluster -319 | NDRG2              | Protein NDRG2                                                                                                         |
| Bos taurus | Cluster -319 | ADSL               | Adenylosuccinate lyase;Adenylosuccinate lyase {ECO:0000256 RuleBase:RU361172}                                         |
| Bos taurus | Cluster -319 | PLA2G7             | Platelet-activating factor acetylhydrolase;Platelet-activating factor acetylhydrolase {ECO:0000256 PIRNR:PIRNR018169} |
| Bos taurus | Cluster -319 | N/A                | N/A                                                                                                                   |
| Bos taurus | Cluster -319 | CTSL;CTSV          | Cathepsin L1;Cathepsin L2                                                                                             |
| Bos taurus | Cluster -319 | PF4                | C-X-C motif chemokine {ECO:0000256 RuleBase:RU361149};Platelet factor 4                                               |
| Bos taurus | Cluster -319 | N/A                | N/A                                                                                                                   |
| Bos taurus | Cluster -319 | FBP1               | Fructose-1,6-bisphosphatase 1                                                                                         |
| Bos taurus | Cluster -319 | APOB               | N/A                                                                                                                   |
| Bos taurus | Cluster -319 | CST3               | Cystatin-C                                                                                                            |
| Bos taurus | Cluster -319 | PFN1               | Profilin {ECO:0000256 RuleBase:RU003909};Profilin-1                                                                   |
| Bos taurus | Cluster -319 | GSTA2              | Glutathione S-transferase A2                                                                                          |
| Bos taurus | Cluster -319 | N/A                | N/A                                                                                                                   |
| Bos taurus | Cluster -319 | THBS4              | Thrombospondin-4                                                                                                      |
| Bos taurus | Cluster -319 | TPT1               | Translationally-controlled tumor protein                                                                              |
| Bos taurus | Cluster -319 | HABP2              | Hyaluronan-binding protein 2                                                                                          |
| Bos taurus | Cluster -317 | GPI                | Glucose-6-phosphate isomerase                                                                                         |
| Bos taurus | Cluster -317 | AKAP9              | N/A                                                                                                                   |

|            |              |                             |                                                                                                                                                     |
|------------|--------------|-----------------------------|-----------------------------------------------------------------------------------------------------------------------------------------------------|
| Bos taurus | Cluster -317 | N/A                         | N/A                                                                                                                                                 |
| Bos taurus | Cluster -317 | AHCY                        | Adenosylhomocysteinase                                                                                                                              |
| Bos taurus | Cluster -317 | GAS6                        | N/A                                                                                                                                                 |
| Bos taurus | Cluster -317 | N/A                         | N/A                                                                                                                                                 |
| Bos taurus | Cluster -317 | ATOX1                       | Copper transport protein ATOX1                                                                                                                      |
| Bos taurus | Cluster -317 | TIMP3                       | Metalloproteinase inhibitor 3                                                                                                                       |
| Bos taurus | Cluster -317 | N/A                         | N/A                                                                                                                                                 |
| Bos taurus | Cluster -317 | EEF1B                       | Elongation factor 1-beta                                                                                                                            |
| Bos taurus | Cluster -317 | PSAP                        | Prosaposin                                                                                                                                          |
| Bos taurus | Cluster -317 | AXL                         | N/A                                                                                                                                                 |
| Bos taurus | Cluster -317 | EEF2                        | Elongation factor 2                                                                                                                                 |
| Bos taurus | Cluster -317 | N/A                         | N/A                                                                                                                                                 |
| Bos taurus | Cluster -317 | DMKN                        | Dermokine                                                                                                                                           |
| Bos taurus | Cluster -317 | N/A                         | N/A                                                                                                                                                 |
| Bos taurus | Cluster -317 | WARS                        | Tryptophan--tRNA ligase, cytoplasmic                                                                                                                |
| Bos taurus | Cluster -317 | OMD                         | Osteomodulin                                                                                                                                        |
| Bos taurus | Cluster -317 | N/A                         | N/A                                                                                                                                                 |
| Bos taurus | Cluster -317 | TNNT2                       | Troponin T, cardiac muscle                                                                                                                          |
| Bos taurus | Cluster -317 | SERPINA3;<br>SERPINA3-<br>7 | Serpin A3-7                                                                                                                                         |
| Bos taurus | Cluster -317 | PLVAP                       | N/A                                                                                                                                                 |
| Bos taurus | Cluster -317 | EEF1D                       | Elongation factor 1-delta                                                                                                                           |
| Bos taurus | Cluster -317 | MTAP                        | S-methyl-5'-thioadenosine phosphorylase {ECO:0000255 HAMAP-Rule:MF_03155};S-methyl-5'-thioadenosine phosphorylase {ECO:0000256 HAMAP-Rule:MF_03155} |
| Bos taurus | Cluster -317 | ICAM1;ICA<br>M3             | Intercellular adhesion molecule 1;Intercellular adhesion molecule 3                                                                                 |
| Bos taurus | Cluster -317 | SERPINH1                    | Serpin H1                                                                                                                                           |
| Bos taurus | Cluster -317 | ITIH2                       | N/A                                                                                                                                                 |
| Bos taurus | Cluster -317 | N/A                         | Pyruvate kinase {ECO:0000256 RuleBase:RU000504}                                                                                                     |
| Bos taurus | Cluster -317 | AMY2B;LO<br>C539383         | Alpha-amylase {ECO:0000256 RuleBase:RU361134,<br>ECO:0000256 SAAS:SAAS00280836}                                                                     |
| Bos taurus | Cluster -317 | APMAP                       | Adipocyte plasma membrane-associated protein                                                                                                        |
| Bos taurus | Cluster -317 | TAGLN2                      | Transgelin-2                                                                                                                                        |
| Bos taurus | Cluster -317 | N/A                         | N/A                                                                                                                                                 |
| Bos taurus | Cluster -317 | HEXB                        | Beta-hexosaminidase {ECO:0000256 PIRNR:PIRNR001093}                                                                                                 |
| Bos taurus | Cluster -317 | TGFBI                       | Transforming growth factor-beta-induced protein ig-h3                                                                                               |
| Bos taurus | Cluster -317 | IGFBP1                      | Insulin-like growth factor-binding protein 1                                                                                                        |
| Bos taurus | Cluster -317 | N/A                         | N/A                                                                                                                                                 |
| Bos taurus | Cluster -317 | N/A                         | N/A                                                                                                                                                 |
| Bos taurus | Cluster -317 | ANG1                        | Angiogenin-1                                                                                                                                        |
| Bos taurus | Cluster -317 | TKT                         | Transketolase                                                                                                                                       |
| Bos taurus | Cluster -317 | N/A                         | N/A                                                                                                                                                 |
| Bos taurus | Cluster -317 | N/A                         | N/A                                                                                                                                                 |
| Bos taurus | Cluster -317 | ITPA                        | Inosine triphosphate pyrophosphatase {ECO:0000255 HAMAP-Rule:MF_03148}                                                                              |

|            |              |           |                                                                                                                             |
|------------|--------------|-----------|-----------------------------------------------------------------------------------------------------------------------------|
| Bos taurus | Cluster -317 | LOC512672 | BOLA class I histocompatibility antigen, alpha chain BL3-6;BOLA class I histocompatibility antigen, alpha chain BL3-7       |
| Bos taurus | Cluster -317 | HSP90AA1  | Heat shock protein HSP 90-alpha                                                                                             |
| Bos taurus | Cluster -317 | FAM3C     | Protein FAM3C                                                                                                               |
| Bos taurus | Cluster -317 | DAG1      | Dystroglycan                                                                                                                |
| Bos taurus | Cluster -317 | N/A       | N/A                                                                                                                         |
| Bos taurus | Cluster -317 | DSTN      | Destrin                                                                                                                     |
| Bos taurus | Cluster -317 | CAND1     | Cullin-associated NEDD8-dissociated protein 1                                                                               |
| Bos taurus | Cluster -317 | F10       | Coagulation factor X                                                                                                        |
| Bos taurus | Cluster -317 | N/A       | N/A                                                                                                                         |
| Bos taurus | Cluster -317 | CAP1      | Adenylyl cyclase-associated protein {ECO:0000256 RuleBase:RU000647};Adenylyl cyclase-associated protein 1                   |
| Bos taurus | Cluster -317 | N/A       | N/A                                                                                                                         |
| Bos taurus | Cluster -317 | N/A       | N/A                                                                                                                         |
| Bos taurus | Cluster -317 | RNASE4    | Ribonuclease 4                                                                                                              |
| Bos taurus | Cluster -317 | N/A       | N/A                                                                                                                         |
| Bos taurus | Cluster -317 | SMPD1     | Sphingomyelin phosphodiesterase                                                                                             |
| Bos taurus | Cluster -317 | N/A       | N/A                                                                                                                         |
| Bos taurus | Cluster -317 | N/A       | N/A                                                                                                                         |
| Bos taurus | Cluster -317 | RSU1      | Ras suppressor protein 1                                                                                                    |
| Bos taurus | Cluster -317 | N/A       | N/A                                                                                                                         |
| Bos taurus | Cluster -317 | GH1       | Somatotropin                                                                                                                |
| Bos taurus | Cluster -317 | COL6A3    | N/A                                                                                                                         |
| Bos taurus | Cluster -317 | GSTT1     | Glutathione S-transferase theta-1                                                                                           |
| Bos taurus | Cluster -317 | PGAM1     | Phosphoglycerate mutase 1                                                                                                   |
| Bos taurus | Cluster -317 | N/A       | N/A                                                                                                                         |
| Bos taurus | Cluster -317 | PRDX6     | Peroxiredoxin-6                                                                                                             |
| Bos taurus | Cluster -317 | SELENOP   | Selenoprotein P {ECO:0000305}                                                                                               |
| Bos taurus | Cluster -317 | PEBP1     | Phosphatidylethanolamine-binding protein 1                                                                                  |
| Bos taurus | Cluster -317 | N/A       | Hemoglobin fetal subunit beta                                                                                               |
| Bos taurus | Cluster -317 | CHAD      | Chondroadherin                                                                                                              |
| Bos taurus | Cluster -317 | N/A       | N/A                                                                                                                         |
| Bos taurus | Cluster -317 | KRT6A     | N/A                                                                                                                         |
| Bos taurus | Cluster -317 | IGFBP2    | Insulin-like growth factor-binding protein 2                                                                                |
| Bos taurus | Cluster -317 | TF        | Serotransferrin                                                                                                             |
| Bos taurus | Cluster -317 | N/A       | N/A                                                                                                                         |
| Bos taurus | Cluster -317 | FTH1      | Ferritin {ECO:0000256 RuleBase:RU361145};Ferritin heavy chain                                                               |
| Bos taurus | Cluster -317 | N/A       | N/A                                                                                                                         |
| Bos taurus | Cluster -317 | NMI       | N-myc-interactor                                                                                                            |
| Bos taurus | Cluster -317 | LOC528040 | N/A                                                                                                                         |
| Bos taurus | Cluster -317 | NUCB1     | Nucleobindin-1                                                                                                              |
| Bos taurus | Cluster -317 | RBP4      | Retinol-binding protein {ECO:0000256 PIRNR:PIRNR036893};Retinol-binding protein 4                                           |
| Bos taurus | Cluster -317 | N/A       | N/A                                                                                                                         |
| Bos taurus | Cluster -317 | GTF2E2    | General transcription factor IIE subunit 2;Transcription initiation factor IIE subunit beta {ECO:0000256 PIRNR:PIRNR016398} |

|            |              |                                                                   |                                                                                            |
|------------|--------------|-------------------------------------------------------------------|--------------------------------------------------------------------------------------------|
| Bos taurus | Cluster -317 | PAICS                                                             | N/A                                                                                        |
| Bos taurus | Cluster -317 | S100B                                                             | Protein S100-B                                                                             |
| Bos taurus | Cluster -317 | N/A                                                               | N/A                                                                                        |
| Bos taurus | Cluster -317 | PBLD                                                              | Phenazine biosynthesis-like domain-containing protein                                      |
| Bos taurus | Cluster -317 | CA3                                                               | Carbonic anhydrase 3                                                                       |
| Bos taurus | Cluster -317 | LOC616942                                                         | N/A                                                                                        |
| Bos taurus | Cluster -317 | N/A                                                               | Lactoylglutathione lyase {ECO:0000256 RuleBase:RU361179}                                   |
| Bos taurus | Cluster -317 | LOC515150                                                         | N/A                                                                                        |
| Bos taurus | Cluster -317 | BHMT                                                              | Betaine--homocysteine S-methyltransferase 1                                                |
| Bos taurus | Cluster -317 | OIT3                                                              | Oncoprotein-induced transcript 3 protein                                                   |
| Bos taurus | Cluster -317 | N/A                                                               | N/A                                                                                        |
| Bos taurus | Cluster -317 | COL18A1                                                           | N/A                                                                                        |
| Bos taurus | Cluster -317 | CHGA                                                              | Chromogranin-A {ECO:0000303 PubMed:3018587, ECO:0000303 PubMed:3755681}                    |
| Bos taurus | Cluster -317 | MBL                                                               | Mannose-binding protein C                                                                  |
| Bos taurus | Cluster -317 | LGALS1                                                            | Galectin-1                                                                                 |
| Bos taurus | Cluster -317 | N/A                                                               | N/A                                                                                        |
| Bos taurus | Cluster -317 | S100A4                                                            | Protein S100-A4                                                                            |
| Bos taurus | Cluster -317 | LOC513659                                                         | N/A                                                                                        |
| Bos taurus | Cluster -317 | PDZK1                                                             | Na(+)/H(+) exchange regulatory cofactor NHE-RF3                                            |
| Bos taurus | Cluster -317 | N/A                                                               | N/A                                                                                        |
| Bos taurus | Cluster -317 | N/A                                                               | N/A                                                                                        |
| Bos taurus | Cluster -317 | N/A                                                               | N/A                                                                                        |
| Bos taurus | Cluster -317 | N/A                                                               | N/A                                                                                        |
| Bos taurus | Cluster -317 | N/A                                                               | N/A                                                                                        |
| Bos taurus | Cluster -317 | VASP                                                              | Vasodilator-stimulated phosphoprotein                                                      |
| Bos taurus | Cluster -317 | N/A                                                               | N/A                                                                                        |
| Bos taurus | Cluster -317 | FERMT3                                                            | Fermitin family homolog 3                                                                  |
| Bos taurus | Cluster -317 | PSPH                                                              | Phosphoserine phosphatase                                                                  |
| Bos taurus | Cluster -317 | N/A                                                               | N/A                                                                                        |
| Bos taurus | Cluster -317 | N/A                                                               | N/A                                                                                        |
| Bos taurus | Cluster -317 | N/A                                                               | N/A                                                                                        |
| Bos taurus | Cluster -317 | LPL                                                               | Lipoprotein lipase                                                                         |
| Bos taurus | Cluster -317 | 20ALPHA-HSD;AKR1C3;AKR1C4;LOC527068;LOC538060;LOC782884;LOC785762 | Dihydrodiol dehydrogenase 3;Prostaglandin F synthase 1;Prostaglandin F synthase 2          |
| Bos taurus | Cluster -317 | IGFBP5                                                            | Insulin-like growth factor-binding protein 5                                               |
| Bos taurus | Cluster -317 | PCTP                                                              | Phosphatidylcholine transfer protein                                                       |
| Bos taurus | Cluster -317 | PDIA3                                                             | Protein disulfide-isomerase {ECO:0000256 RuleBase:RU361130};Protein disulfide-isomerase A3 |
| Bos taurus | Cluster -317 | PRL                                                               | Prolactin                                                                                  |
| Bos taurus | Cluster -317 | N/A                                                               | N/A                                                                                        |

|            |              |        |                                                     |
|------------|--------------|--------|-----------------------------------------------------|
| Bos taurus | Cluster -317 | DBI    | Acyl-CoA-binding protein                            |
| Bos taurus | Cluster -317 | TXN    | Thioredoxin                                         |
| Bos taurus | Cluster -317 | N/A    | Hexosyltransferase {ECO:0000256 RuleBase:RU363063}  |
| Bos taurus | Cluster -317 | N/A    | N/A                                                 |
| Bos taurus | Cluster -317 | N/A    | N/A                                                 |
| Bos taurus | Cluster -317 | HINT1  | Histidine triad nucleotide-binding protein 1        |
| Bos taurus | Cluster -317 | CPPED1 | Serine/threonine-protein phosphatase CPPED1         |
| Bos taurus | Cluster -317 | CNN2   | Calponin {ECO:0000256 RuleBase:RU361224};Calponin-2 |

**Table S3.** Proteins conserved before and after the BBB passage.

| <b>Taxonomy</b> | <b>Cluster</b> | <b>Gene name</b>                           | <b>Uniprot full protein name</b>                                                    |
|-----------------|----------------|--------------------------------------------|-------------------------------------------------------------------------------------|
| Bos taurus      | Cluster 71     | N/A                                        | N/A                                                                                 |
| Bos taurus      | Cluster -89    | TTR                                        | Transthyretin                                                                       |
| Bos taurus      | Cluster -89    | SERPINA1                                   | Alpha-1-antitrypsin                                                                 |
| Bos taurus      | Cluster -89    | N/A                                        | N/A                                                                                 |
| Bos taurus      | Cluster -89    | AHSG                                       | Alpha-2-HS-glycoprotein                                                             |
| Bos taurus      | Cluster -142   | APOA4                                      | Apolipoprotein A-IV                                                                 |
| Bos taurus      | Cluster -142   | F9                                         | Coagulation factor IX                                                               |
| Bos taurus      | Cluster -142   | CLU                                        | Clusterin                                                                           |
| Bos taurus      | Cluster -142   | APOC4                                      | Apolipoprotein C-IV                                                                 |
| Bos taurus      | Cluster -142   | PROZ                                       | Vitamin K-dependent protein Z                                                       |
| Bos taurus      | Cluster -142   | ITIH2                                      | N/A                                                                                 |
| Bos taurus      | Cluster -142   | HBB                                        | Hemoglobin fetal subunit beta;Hemoglobin subunit beta                               |
| Bos taurus      | Cluster -142   | CFB                                        | Complement factor B                                                                 |
| Bos taurus      | Cluster -142   | N/A                                        | N/A                                                                                 |
| Bos taurus      | Cluster -142   | LBP                                        | Lipopolysaccharide-binding protein                                                  |
| Bos taurus      | Cluster -142   | SERPINC1                                   | Antithrombin-III                                                                    |
| Bos taurus      | Cluster -142   | SERPINA3;<br>SERPINA3-<br>7;SERPINA<br>3-8 | Serpin A3-7;Serpin A3-8                                                             |
| Bos taurus      | Cluster -142   | HPX                                        | Hemopexin                                                                           |
| Bos taurus      | Cluster -142   | THAP5                                      | THAP domain-containing protein 5                                                    |
| Bos taurus      | Cluster -142   | ALB                                        | Serum albumin                                                                       |
| Bos taurus      | Cluster -142   | agp;ORM1                                   | Alpha-1-acid glycoprotein;Alpha-1-acid glycoprotein {ECO:0000256 PIRNR:PIRNR036899} |
| Bos taurus      | Cluster 10     | APOC3                                      | Apolipoprotein C-III                                                                |
| Bos taurus      | Cluster -139   | APOA2                                      | Apolipoprotein A-II                                                                 |
| Bos taurus      | Cluster -139   | HBA                                        | Hemoglobin subunit alpha                                                            |
| Bos taurus      | Cluster -139   | APOA1                                      | Apolipoprotein A-I                                                                  |
| Bos taurus      | Cluster -139   | N/A                                        | N/A                                                                                 |
| Bos taurus      | Cluster 32     | N/A                                        | N/A                                                                                 |
| Bos taurus      | Cluster -144   | N/A                                        | N/A                                                                                 |
| Bos taurus      | Cluster -144   | KLKB1                                      | Plasma kallikrein                                                                   |
| Bos taurus      | Cluster -144   | N/A                                        | Anion exchange protein {ECO:0000256 RuleBase:RU362035}                              |
| Bos taurus      | Cluster -144   | ANXA6                                      | Annexin A6                                                                          |
| Bos taurus      | Cluster -144   | VNN1                                       | Pantetheinase                                                                       |
| Bos taurus      | Cluster -144   | IGF2R                                      | Cation-independent mannose-6-phosphate receptor                                     |
| Bos taurus      | Cluster -144   | MST1                                       | Hepatocyte growth factor-like protein                                               |
| Bos taurus      | Cluster -144   | CPB2                                       | Carboxypeptidase B2                                                                 |
| Bos taurus      | Cluster -144   | N/A                                        | N/A                                                                                 |
| Bos taurus      | Cluster -144   | LOC515150                                  | N/A                                                                                 |
| Bos taurus      | Cluster -144   | LOC525947                                  | N/A                                                                                 |
| Bos taurus      | Cluster -144   | CTRB1                                      | N/A                                                                                 |
| Bos taurus      | Cluster -144   | SERPINF2                                   | Alpha-2-antiplasmin                                                                 |

|            |              |                                                         |                                                                                                |
|------------|--------------|---------------------------------------------------------|------------------------------------------------------------------------------------------------|
| Bos taurus | Cluster -144 | ITGB3                                                   | Integrin beta {ECO:0000256 RuleBase:RU000633}                                                  |
| Bos taurus | Cluster -144 | N/A                                                     | N/A                                                                                            |
| Bos taurus | Cluster -144 | VASN                                                    | N/A                                                                                            |
| Bos taurus | Cluster -144 | F12                                                     | Coagulation factor XII                                                                         |
| Bos taurus | Cluster -144 | LGALS3BP                                                | Galectin-3-binding protein                                                                     |
| Bos taurus | Cluster -144 | N/A                                                     | N/A                                                                                            |
| Bos taurus | Cluster -144 | N/A                                                     | N/A                                                                                            |
| Bos taurus | Cluster -144 | N/A                                                     | Fibulin-1 {ECO:0000256 PIRNR:PIRNR036313}                                                      |
| Bos taurus | Cluster -144 | N/A                                                     | N/A                                                                                            |
| Bos taurus | Cluster -144 | IGFBP3                                                  | Insulin-like growth factor-binding protein 3                                                   |
| Bos taurus | Cluster -144 | GSTA1                                                   | Glutathione S-transferase {ECO:0000256 RuleBase:RU003494};Glutathione S-transferase A1         |
| Bos taurus | Cluster -144 | SPP1                                                    | Osteopontin;Osteopontin-K                                                                      |
| Bos taurus | Cluster -144 | GALK1                                                   | Galactokinase                                                                                  |
| Bos taurus | Cluster -144 | CTSZ                                                    | Cathepsin Z                                                                                    |
| Bos taurus | Cluster -144 | N/A                                                     | N/A                                                                                            |
| Bos taurus | Cluster -144 | N/A                                                     | Tubulin beta chain {ECO:0000256 RuleBase:RU000352}                                             |
| Bos taurus | Cluster -144 | BLVRB                                                   | Flavin reductase (NADPH)                                                                       |
| Bos taurus | Cluster -144 | CLEC3B                                                  | Tetranectin                                                                                    |
| Bos taurus | Cluster -144 | TG                                                      | Thyroglobulin                                                                                  |
| Bos taurus | Cluster -144 | N/A                                                     | N/A                                                                                            |
| Bos taurus | Cluster -144 | N/A                                                     | N/A                                                                                            |
| Bos taurus | Cluster -144 | N/A                                                     | N/A                                                                                            |
| Bos taurus | Cluster -144 | PGK1                                                    | Phosphoglycerate kinase {ECO:0000256 RuleBase:RU000532};Phosphoglycerate kinase 1              |
| Bos taurus | Cluster -143 | N/A                                                     | N/A                                                                                            |
| Bos taurus | Cluster -143 | PLG                                                     | Plasminogen;Plasminogen {ECO:0000256 PIRNR:PIRNR001150}                                        |
| Bos taurus | Cluster -143 | A2M                                                     | Alpha-2-macroglobulin                                                                          |
| Bos taurus | Cluster -143 | A1BG                                                    | Alpha-1B-glycoprotein {ECO:0000250 UniProtKB:P04217}                                           |
| Bos taurus | Cluster -143 | KNG2                                                    | Kininogen-2                                                                                    |
| Bos taurus | Cluster -143 | N/A                                                     | N/A                                                                                            |
| Bos taurus | Cluster -143 | FETUB                                                   | Fetuin-B                                                                                       |
| Bos taurus | Cluster -143 | AFP                                                     | Alpha-fetoprotein                                                                              |
| Bos taurus | Cluster -143 | SPP2                                                    | Secreted phosphoprotein 24                                                                     |
| Bos taurus | Cluster -143 | ADIPOQ                                                  | Adiponectin                                                                                    |
| Bos taurus | Cluster -143 | GC                                                      | Vitamin D-binding protein                                                                      |
| Bos taurus | Cluster -143 | LTF;TF                                                  | Lactotransferrin;Serotransferrin                                                               |
| Bos taurus | Cluster -143 | LOC784932; SERPINA3; SERPINA3-1;SERPINA 3-2;SERPINA 3-7 | Serpina A3-1 {ECO:0000303 PubMed:18384666};Serpina A3-2;Serpina A3-7                           |
| Bos taurus | Cluster -143 | SERPINA3; SERPINA3-                                     | Serpina A3-1 {ECO:0000303 PubMed:18384666};Serpina A3-2;Serpina A3-3;Serpina A3-4;Serpina A3-8 |

|            |              |                                                                           |                                                                                 |
|------------|--------------|---------------------------------------------------------------------------|---------------------------------------------------------------------------------|
|            |              | 1;SERPINA<br>3-<br>2;SERPINA<br>3-<br>3;SERPINA<br>3-<br>4;SERPINA<br>3-8 |                                                                                 |
| Bos taurus | Cluster -143 | C1QB                                                                      | Complement C1q subcomponent subunit B                                           |
| Bos taurus | Cluster -143 | N/A                                                                       | N/A                                                                             |
| Bos taurus | Cluster -143 | MGP                                                                       | Matrix Gla protein                                                              |
| Bos taurus | Cluster -143 | CHIA                                                                      | Acidic mammalian chitinase                                                      |
| Bos taurus | Cluster -143 | SERPINA6                                                                  | Corticosteroid-binding globulin                                                 |
| Bos taurus | Cluster -143 | N/A                                                                       | Pentaxin {ECO:0000256 RuleBase:RU362112}                                        |
| Bos taurus | Cluster -143 | GPLD1                                                                     | Phosphatidylinositol-glycan-specific phospholipase D                            |
| Bos taurus | Cluster -143 | N/A                                                                       | N/A                                                                             |
| Bos taurus | Cluster -143 | FGA                                                                       | Fibrinogen alpha chain                                                          |
| Bos taurus | Cluster -143 | N/A                                                                       | N/A                                                                             |
| Bos taurus | Cluster -143 | N/A                                                                       | N/A                                                                             |
| Bos taurus | Cluster -143 | F5                                                                        | Coagulation factor V                                                            |
| Bos taurus | Cluster -143 | N/A                                                                       | Sulfhydryl oxidase {ECO:0000256 RuleBase:RU371123}                              |
| Bos taurus | Cluster -143 | C4;LOC107<br>131209                                                       | Complement C4                                                                   |
| Bos taurus | Cluster -143 | TPI1                                                                      | Triosephosphate isomerase                                                       |
| Bos taurus | Cluster -143 | N/A                                                                       | N/A                                                                             |
| Bos taurus | Cluster -143 | N/A                                                                       | Protein HP-20 homolog                                                           |
| Bos taurus | Cluster -143 | N/A                                                                       | N/A                                                                             |
| Bos taurus | Cluster -143 | FN1                                                                       | Fibronectin                                                                     |
| Bos taurus | Cluster -143 | AFM                                                                       | Afamin {ECO:0000303 PubMed:26902720}                                            |
| Bos taurus | Cluster -143 | LDHA                                                                      | L-lactate dehydrogenase A chain                                                 |
| Bos taurus | Cluster -143 | C1S                                                                       | Complement C1s subcomponent                                                     |
| Bos taurus | Cluster -143 | N/A                                                                       | N/A                                                                             |
| Bos taurus | Cluster -143 | PROS1                                                                     | Vitamin K-dependent protein S                                                   |
| Bos taurus | Cluster -143 | N/A                                                                       | N/A                                                                             |
| Bos taurus | Cluster -143 | CFD                                                                       | Complement factor D                                                             |
| Bos taurus | Cluster -143 | PTGR1                                                                     | Prostaglandin reductase 1                                                       |
| Bos taurus | Cluster -143 | N/A                                                                       | N/A                                                                             |
| Bos taurus | Cluster -143 | BPIFB1                                                                    | BPI fold-containing family B member 1                                           |
| Bos taurus | Cluster -143 | AMY2B;LO<br>C539383                                                       | Alpha-amylase {ECO:0000256 RuleBase:RU361134,<br>ECO:0000256 SAAS:SAAS00280836} |
| Bos taurus | Cluster -143 | THBS1                                                                     | Thrombospondin-1                                                                |
| Bos taurus | Cluster -143 | SULT1E1                                                                   | Estrogen sulfotransferase;Sulfotransferase<br>{ECO:0000256 RuleBase:RU361155}   |
| Bos taurus | Cluster -143 | C7                                                                        | Complement component C7                                                         |
| Bos taurus | Cluster -143 | N/A                                                                       | N/A                                                                             |
| Bos taurus | Cluster -143 | STIP1                                                                     | Stress-induced-phosphoprotein 1                                                 |
| Bos taurus | Cluster -143 | FGG                                                                       | Fibrinogen gamma-B chain                                                        |
| Bos taurus | Cluster -143 | CFH                                                                       | Complement factor H                                                             |



|            |              |          |                                                                      |
|------------|--------------|----------|----------------------------------------------------------------------|
| Bos taurus | Cluster -143 | C9       | Complement component C9                                              |
| Bos taurus | Cluster -143 | APOD     | Apolipoprotein D;Apolipoprotein D<br>{ECO:0000256 PIRNR:PIRNR036893} |
| Bos taurus | Cluster -143 | KRT10    | Keratin, type I cytoskeletal 10                                      |
| Bos taurus | Cluster -143 | FGB      | Fibrinogen beta chain                                                |
| Bos taurus | Cluster -143 | N/A      | N/A                                                                  |
| Bos taurus | Cluster -143 | ENO1     | Alpha-enolase                                                        |
| Bos taurus | Cluster -143 | N/A      | N/A                                                                  |
| Bos taurus | Cluster -143 | GGH      | Gamma-glutamyl hydrolase                                             |
| Bos taurus | Cluster -143 | APOE     | Apolipoprotein E                                                     |
| Bos taurus | Cluster -143 | APOB     |                                                                      |
| Bos taurus | Cluster -143 | SERPINF1 | Pigment epithelium-derived factor                                    |
| Bos taurus | Cluster -143 | N/A      | Factor XIIa inhibitor                                                |
| Bos taurus | Cluster -143 | N/A      | N/A                                                                  |
| Bos taurus | Cluster -143 | N/A      | N/A                                                                  |
| Bos taurus | Cluster -143 | ITIH3    | Inter-alpha-trypsin inhibitor heavy chain H3                         |
| Bos taurus | Cluster -143 | SFTPB    | Pulmonary surfactant-associated protein B                            |
| Bos taurus | Cluster -143 | SAA4     | Serum amyloid A-4 protein                                            |
| Bos taurus | Cluster -143 | C3       | Complement C3                                                        |
| Bos taurus | Cluster -143 | GSN      | Gelsolin                                                             |
| Bos taurus | Cluster -143 | F2       | Prothrombin                                                          |
| Bos taurus | Cluster -143 | B2M      | Beta-2-microglobulin                                                 |
| Bos taurus | Cluster -143 | AMBP     | Protein AMBP                                                         |
| Bos taurus | Cluster -143 | CPN1     | Carboxypeptidase N catalytic chain                                   |
| Bos taurus | Cluster -143 | ITIH4    | Inter-alpha-trypsin inhibitor heavy chain H4                         |
| Bos taurus | Cluster -143 | N/A      | N/A                                                                  |
| Bos taurus | Cluster -143 | GAPDH    | Glyceraldehyde-3-phosphate dehydrogenase                             |
| Bos taurus | Cluster -143 | SERPINA5 | Plasma serine protease inhibitor                                     |
| Bos taurus | Cluster -143 | N/A      | Clusterin {ECO:0000256 RuleBase:RU000629}                            |
| Bos taurus | Cluster -143 | N/A      | N/A                                                                  |
| Bos taurus | Cluster -143 | MB       | Myoglobin                                                            |
| Bos taurus | Cluster -143 | ITIH1    | Inter-alpha-trypsin inhibitor heavy chain H1                         |
| Bos taurus | Cluster -143 | HMGB2    | High mobility group protein B2                                       |
| Bos taurus | Cluster -143 | LUM      | Lumican                                                              |
| Bos taurus | Cluster -143 | RGN      | Regucalcin                                                           |
| Bos taurus | Cluster -143 | SERPINA7 | Thyroxine-binding globulin                                           |
| Bos taurus | Cluster -143 | F13A1    | Coagulation factor XIII A chain                                      |
| Bos taurus | Cluster -143 | MFAP4    | Microfibril-associated glycoprotein 4                                |

**Table S4.** Protein exclusive of LMNVs exposed to medium conditioned by bEnd.3

| <b>Taxonomy</b> | <b>Gene names</b>                  | <b>Protein names</b>                                                                                                                                                                   |
|-----------------|------------------------------------|----------------------------------------------------------------------------------------------------------------------------------------------------------------------------------------|
| Bos taurus      | HPCAL1                             | Hippocalcin-like protein 1                                                                                                                                                             |
| Bos taurus      | CEP290                             | Centrosomal protein of 290 kDa                                                                                                                                                         |
| Bos taurus      | PSME1                              | Proteasome activator complex subunit 1                                                                                                                                                 |
| Bos taurus      | NAT1                               | Arylamine N-acetyltransferase 1                                                                                                                                                        |
| Bos taurus      | FAHD2;FAHD2A                       | Fumarylacetoacetate hydrolase domain-containing protein 2                                                                                                                              |
| Bos taurus      | IGFBP4                             | Insulin-like growth factor-binding protein 4                                                                                                                                           |
| Bos taurus      | HMBS                               | Porphobilinogen deaminase                                                                                                                                                              |
| Bos taurus      | GPX3                               | Glutathione peroxidase<br>{ECO:0000256 RuleBase:RU000499};Glutathione peroxidase 3                                                                                                     |
| Bos taurus      | EXT1                               | Exostosin-1                                                                                                                                                                            |
| Bos taurus      | CAPN2                              | Calpain-2 catalytic subunit                                                                                                                                                            |
| Bos taurus      | ANXA1                              | Annexin {ECO:0000256 RuleBase:RU003540};Annexin A1                                                                                                                                     |
| Bos taurus      | DDX43                              |                                                                                                                                                                                        |
| Bos taurus      | CFHR5                              |                                                                                                                                                                                        |
| Bos taurus      | TNNI3                              | Troponin I, cardiac muscle                                                                                                                                                             |
| Bos taurus      | TPD52                              |                                                                                                                                                                                        |
| Bos taurus      | CEP44                              | Centrosomal protein of 44 kDa                                                                                                                                                          |
| Bos taurus      | LDHB                               | L-lactate dehydrogenase B chain                                                                                                                                                        |
| Bos taurus      | HSPA1A;HSPA1B                      | Heat shock 70 kDa protein 1A;Heat shock 70 kDa protein 1B                                                                                                                              |
| Bos taurus      | C1QA                               | Complement C1q subcomponent subunit A                                                                                                                                                  |
| Bos taurus      | CNDP2                              | Cytosolic non-specific dipeptidase                                                                                                                                                     |
| Bos taurus      | CARF                               | Calcium-responsive transcription factor                                                                                                                                                |
| Bos taurus      | KNG1;KNG2                          | Kininogen-1;Kininogen-2                                                                                                                                                                |
| Bos taurus      | COL5A1                             |                                                                                                                                                                                        |
| Bos taurus      | CATHL2;CATHL3;CATHL5;CATHL6;CATHL7 | Cathelicidin-2;Cathelicidin-3;<br>Cathelicidin-5;Cathelicidin-6;Cathelicidin-7                                                                                                         |
| Bos taurus      | BTF3L4                             | Transcription factor BTF3 homolog 4                                                                                                                                                    |
| Bos taurus      | CLU                                | Clusterin;Clusterin {ECO:0000256 RuleBase:RU000629}                                                                                                                                    |
| Bos taurus      |                                    | Homeobox protein engrailed-like<br>{ECO:0000256 RuleBase:RU510713}                                                                                                                     |
| Bos taurus      | SORD                               | Sorbitol dehydrogenase                                                                                                                                                                 |
| Bos taurus      | AKR1A1                             | Alcohol dehydrogenase [NADP(+)]                                                                                                                                                        |
| Bos taurus      | HGD                                | N/A                                                                                                                                                                                    |
| Mus Musculus    | Lamp1                              | Lysosome-associated membrane glycoprotein 1                                                                                                                                            |
| Mus Musculus    | Mcm3                               | DNA replication licensing factor MCM3                                                                                                                                                  |
| Mus Musculus    | Eif3j1;Eif3j2                      | Eukaryotic translation initiation factor 3 subunit J-A;Eukaryotic translation initiation factor 3 subunit J-B                                                                          |
| Mus Musculus    | Nnmt                               | Nicotinamide N-methyltransferase                                                                                                                                                       |
| Mus Musculus    | Ermp1                              | Endoplasmic reticulum metallopeptidase 1                                                                                                                                               |
| Mus Musculus    | Plau                               | Urokinase-type plasminogen activator;Urokinase-type plasminogen activator long chain A;Urokinase-type plasminogen activator short chain A;Urokinase-type plasminogen activator chain B |
| Mus Musculus    | A2m                                | Histidine triad nucleotide-binding protein 1                                                                                                                                           |
| Mus Musculus    | Sars                               | Serine--tRNA ligase, cytoplasmic                                                                                                                                                       |
| Mus Musculus    | Tinagl1                            | Tubulointerstitial nephritis antigen-like                                                                                                                                              |
| Mus Musculus    | Scamp3                             | Secretory carrier-associated membrane protein 3                                                                                                                                        |
| Mus Musculus    | Ndufa11                            | NADH dehydrogenase [ubiquinone] 1 alpha subcomplex                                                                                                                                     |

|              |               |                                                                                                                 |
|--------------|---------------|-----------------------------------------------------------------------------------------------------------------|
|              |               | subunit 11                                                                                                      |
| Mus Musculus | Shcbp1        | SHC SH2 domain-binding protein 1                                                                                |
| Mus Musculus | Ywhaz         | 14-3-3 protein zeta/delta                                                                                       |
| Mus Musculus | Actr10        | Actin-related protein 10                                                                                        |
| Mus Musculus | St13          | Hsc70-interacting protein                                                                                       |
| Mus Musculus | Dock6         | Dedicator of cytokinesis protein 6                                                                              |
| Mus Musculus | Tbcd          | Tubulin-specific chaperone D                                                                                    |
| Mus Musculus | Acox1         |                                                                                                                 |
| Mus Musculus | Rab3gap2      | Rab3 GTPase-activating protein non-catalytic subunit                                                            |
| Mus Musculus | Col4a2        | Collagen alpha-2(IV) chain;Canstatin                                                                            |
| Mus Musculus | Hk2           | Hexokinase-2;Hexokinase                                                                                         |
| Mus Musculus | Lman1         | Protein ERGIC-53                                                                                                |
| Mus Musculus | Anxa5         | Annexin A5                                                                                                      |
| Mus Musculus | Naa60         |                                                                                                                 |
| Mus Musculus | Tjp1          | Tight junction protein ZO-1                                                                                     |
| Mus Musculus | Tor1aip1      | Torsin-1A-interacting protein 1                                                                                 |
| Mus Musculus | Ndufv1        | NADH dehydrogenase [ubiquinone] flavoprotein 1, mitochondrial                                                   |
| Mus Musculus | Tns1          |                                                                                                                 |
| Mus Musculus | Usp9x         | Ubiquitin carboxyl-terminal hydrolase;Probable ubiquitin carboxyl-terminal hydrolase FAF-X                      |
| Mus Musculus | Fam162a       | Protein FAM162A                                                                                                 |
| Mus Musculus | Hnrnpf        | Heterogeneous nuclear ribonucleoprotein F;Heterogeneous nuclear ribonucleoprotein F, N-terminally processed     |
| Mus Musculus | Plp2          | Proteolipid protein 2                                                                                           |
| Mus Musculus | Dcakd         | Dephospho-CoA kinase domain-containing protein                                                                  |
| Mus Musculus | Kif23         | Kinesin-like protein KIF23                                                                                      |
| Mus Musculus | Il17f         | Interleukin-17F                                                                                                 |
| Mus Musculus | G6pd2;G6pdx   | Glucose-6-phosphate 1-dehydrogenase;Glucose-6-phosphate 1-dehydrogenase 2;Glucose-6-phosphate 1-dehydrogenase X |
| Mus Musculus | Abcf1         | ATP-binding cassette sub-family F member 1                                                                      |
| Mus Musculus | Snrnp200      | U5 small nuclear ribonucleoprotein 200 kDa helicase                                                             |
| Mus Musculus | Hsd17b10      | 3-hydroxyacyl-CoA dehydrogenase type-2                                                                          |
| Mus Musculus | Gars          | Glycine--tRNA ligase                                                                                            |
| Mus Musculus | Plod1;Plod3   | Procollagen-lysine,2-oxoglutarate 5-dioxygenase 1;Procollagen-lysine,2-oxoglutarate 5-dioxygenase 3             |
| Mus Musculus | Ndufs6        | NADH dehydrogenase [ubiquinone] iron-sulfur protein 6, mitochondrial                                            |
| Mus Musculus | Focad         | Focadhesin                                                                                                      |
| Mus Musculus | Fis1          | Mitochondrial fission 1 protein                                                                                 |
| Mus Musculus | Clic4         | Chloride intracellular channel protein 4                                                                        |
| Mus Musculus | Coro1c        | Coronin-1C                                                                                                      |
| Mus Musculus | Lemd2         | LEM domain-containing protein 2                                                                                 |
| Mus Musculus | Mllt4         | Afadin                                                                                                          |
| Mus Musculus | Ccdc22        | Coiled-coil domain-containing protein 22                                                                        |
| Mus Musculus | Rab8a         | Ras-related protein Rab-8A                                                                                      |
| Mus Musculus | Sdpr          | Serum deprivation-response protein                                                                              |
| Mus Musculus | Fundc2        | FUN14 domain-containing protein 2                                                                               |
| Mus Musculus | Gm14214;Rpl7a | 60S ribosomal protein L7a                                                                                       |
| Mus Musculus | Naa15         | N-alpha-acetyltransferase 15, NatA auxiliary subunit                                                            |
| Mus Musculus | Trnt1         | CCA tRNA nucleotidyltransferase 1, mitochondrial                                                                |
| Mus Musculus | Sptan1        | Spectrin alpha chain, non-erythrocytic 1                                                                        |
| Mus Musculus | Upfl          | Regulator of nonsense transcripts 1                                                                             |
| Mus Musculus | Scg5          | Neuroendocrine protein 7B2;N-terminal peptide;C-terminal                                                        |

|              |             |                                                                                                                             |
|--------------|-------------|-----------------------------------------------------------------------------------------------------------------------------|
|              |             | peptide                                                                                                                     |
| Mus Musculus | Uxs1        | UDP-glucuronic acid decarboxylase 1                                                                                         |
| Mus Musculus | Apex1       | DNA-(apurinic or apyrimidinic site) lyase;DNA-(apurinic or apyrimidinic site) lyase, mitochondrial                          |
| Mus Musculus | Capn2       | Calpain-2 catalytic subunit                                                                                                 |
| Mus Musculus | Hmox2       | Heme oxygenase 2                                                                                                            |
| Mus Musculus | Nos3        | Nitric oxide synthase;Nitric oxide synthase, endothelial                                                                    |
| Mus Musculus | Msln        | Megakaryocyte-potentiating factor;Mesothelin;Mesothelin, cleaved form                                                       |
| Mus Musculus | Ctsl        | Cathepsin L1;Cathepsin L1 heavy chain;Cathepsin L1 light chain                                                              |
| Mus Musculus | Cct8        | T-complex protein 1 subunit theta                                                                                           |
| Mus Musculus | Adamts4     | A disintegrin and metalloproteinase with thrombospondin motifs 4                                                            |
| Mus Musculus | G6pc2       | Glucose-6-phosphatase 2                                                                                                     |
| Mus Musculus | Mcf2        | Multiple coagulation factor deficiency protein 2 homolog                                                                    |
| Mus Musculus | Abrac1      | Costars family protein ABRACL                                                                                               |
| Mus Musculus | Hadha       | Trifunctional enzyme subunit alpha, mitochondrial;Long-chain enoyl-CoA hydratase;Long chain 3-hydroxyacyl-CoA dehydrogenase |
| Mus Musculus | Eea1        | Early endosome antigen 1                                                                                                    |
| Mus Musculus | Krt17;Krt42 | Keratin, type I cytoskeletal 17;Keratin, type I cytoskeletal 42                                                             |
| Mus Musculus | Chtf18      | Chromosome transmission fidelity protein 18 homolog                                                                         |
| Mus Musculus | Gon4l       | GON-4-like protein                                                                                                          |
| Mus Musculus | Fshr        | Follicle-stimulating hormone receptor                                                                                       |
| Mus Musculus | Serpind1    | Heparin cofactor 2                                                                                                          |
| Mus Musculus | Nipsnap3b   | Protein NipSnap homolog 3B                                                                                                  |
| Mus Musculus | Sec61b      | Protein transport protein Sec61 subunit beta                                                                                |
| Mus Musculus | Syne1       | Nesprin-1                                                                                                                   |
| Mus Musculus | Uqcrrf1     | Cytochrome b-c1 complex subunit 11;Cytochrome b-c1 complex subunit Rieske, mitochondrial                                    |
| Mus Musculus | Banf1       | Barrier-to-autointegration factor;Barrier-to-autointegration factor, N-terminally processed                                 |
| Mus Musculus | Cep83       | Centrosomal protein of 83 kDa                                                                                               |
| Mus Musculus | Bak1        | Bcl-2 homologous antagonist/killer                                                                                          |
| Mus Musculus | Mtrf1       | Peptide chain release factor 1, mitochondrial                                                                               |
| Mus Musculus | Angptl3     | Angiopoietin-related protein 3                                                                                              |
| Mus Musculus | Plvap       | Plasmalemma vesicle-associated protein                                                                                      |
| Mus Musculus | Nsd1        | Histone-lysine N-methyltransferase;Histone-lysine N-methyltransferase, H3 lysine-36 and H4 lysine-20 specific               |
| Mus Musculus | Sorbs1      | Sorbin and SH3 domain-containing protein 1                                                                                  |
| Mus Musculus | Asah1       | Acid ceramidase;Acid ceramidase subunit alpha;Acid ceramidase subunit beta                                                  |
| Mus Musculus | Apool       | MICOS complex subunit Mic27                                                                                                 |
| Mus Musculus | Pla2g4a     | Cytosolic phospholipase A2;Phospholipase A2;Lysophospholipase                                                               |
| Mus Musculus | Ehd4        | EH domain-containing protein 4                                                                                              |
| Mus Musculus | Prkcdp      | Protein kinase C delta-binding protein                                                                                      |
| Mus Musculus | Lmna        | Lamin-A/C;Prelamin-A/C                                                                                                      |
| Mus Musculus | Tpp1        | Tripeptidyl-peptidase 1                                                                                                     |
| Mus Musculus | Myct1       | Myc target protein 1                                                                                                        |
| Mus Musculus | Cdc37       | Hsp90 co-chaperone Cdc37;Hsp90 co-chaperone Cdc37, N-terminally processed                                                   |
| Mus Musculus | Iars2       | Isoleucine--tRNA ligase, mitochondrial                                                                                      |

|              |               |                                                                                                                               |
|--------------|---------------|-------------------------------------------------------------------------------------------------------------------------------|
| Mus Musculus | Krt2          | Keratin, type II cytoskeletal 2 epidermal                                                                                     |
| Mus Musculus | Dync1li2      | Cytoplasmic dynein 1 light intermediate chain 2                                                                               |
| Mus Musculus | Nes           | Nestin                                                                                                                        |
| Mus Musculus | Apoo          | Apolipoprotein O                                                                                                              |
| Mus Musculus | Rpl13         | 60S ribosomal protein L13                                                                                                     |
| Mus Musculus | Fn1           | Anastellin;Fibronectin                                                                                                        |
| Mus Musculus | Racgap1       | Rac GTPase-activating protein 1                                                                                               |
| Mus Musculus | Osbp110       | Oxysterol-binding protein                                                                                                     |
| Mus Musculus | Col6a6        | Collagen alpha-6(VI) chain                                                                                                    |
| Mus Musculus | Cpt1a         | Carnitine O-palmitoyltransferase 1, liver isoform                                                                             |
| Mus Musculus | Adsl          | Adenylosuccinate lyase                                                                                                        |
| Mus Musculus | Akr1b3;Akr1b1 | Aldose reductase                                                                                                              |
| Mus Musculus | Hk1           | Hexokinase;Hexokinase-1                                                                                                       |
| Mus Musculus | Sec13         | Protein SEC13 homolog                                                                                                         |
| Mus Musculus | Adam1a;Adam1b | Disintegrin and metalloproteinase domain-containing protein 1a;Disintegrin and metalloproteinase domain-containing protein 1b |
| Mus Musculus | Eif3l         | Eukaryotic translation initiation factor 3 subunit L                                                                          |
| Mus Musculus | Inhbb         | Inhibin beta B chain                                                                                                          |
| Mus Musculus | Timp3         | Metalloproteinase inhibitor 3                                                                                                 |
| Mus Musculus | Taldo1        | Transaldolase                                                                                                                 |
| Mus Musculus | Fscn1         | Fascin                                                                                                                        |
| Mus Musculus | Tm4sf1        | Transmembrane 4 L6 family member 1                                                                                            |
| Mus Musculus | Tnc           | Tenascin                                                                                                                      |
| Mus Musculus | Cd44          | CD44 antigen                                                                                                                  |
| Mus Musculus | Ndufb4        | NADH dehydrogenase [ubiquinone] 1 beta subcomplex subunit 4                                                                   |
| Mus Musculus | Pcyox1        | Prenylcysteine oxidase                                                                                                        |
| Mus Musculus | Lor           | Loricrin                                                                                                                      |
| Mus Musculus | Uxs1          | UDP-glucuronic acid decarboxylase 1                                                                                           |
| Mus Musculus | Apex1         | DNA-(apurinic or apyrimidinic site) lyase;DNA-(apurinic or apyrimidinic site) lyase, mitochondrial                            |
| Mus Musculus | Capn2         | Calpain-2 catalytic subunit                                                                                                   |
| Mus Musculus | Hmox2         | Heme oxygenase 2                                                                                                              |
| Mus Musculus | Nos3          | Nitric oxide synthase;Nitric oxide synthase, endothelial                                                                      |
| Mus Musculus | Msln          | Megakaryocyte-potentiating factor;Mesothelin;Mesothelin, cleaved form                                                         |
| Mus Musculus | Ctsl          | Cathepsin L1;Cathepsin L1 heavy chain;Cathepsin L1 light chain                                                                |
| Mus Musculus | Cct8          | T-complex protein 1 subunit theta                                                                                             |
| Mus Musculus | Adamts4       | A disintegrin and metalloproteinase with thrombospondin motifs 4                                                              |
| Mus Musculus | G6pc2         | Glucose-6-phosphatase 2                                                                                                       |
| Mus Musculus | Mcf2          | Multiple coagulation factor deficiency protein 2 homolog                                                                      |
| Mus Musculus | Abrac1        | Costars family protein ABRACL                                                                                                 |
| Mus Musculus | Hadha         | Trifunctional enzyme subunit alpha, mitochondrial;Long-chain enoyl-CoA hydratase;Long chain 3-hydroxyacyl-CoA dehydrogenase   |
| Mus Musculus | Eea1          | Early endosome antigen 1                                                                                                      |
| Mus Musculus | Krt17;Krt42   | Keratin, type I cytoskeletal 17;Keratin, type I cytoskeletal 42                                                               |
| Mus Musculus | Chtf18        | Chromosome transmission fidelity protein 18 homolog                                                                           |
| Mus Musculus | Gon4l         | GON-4-like protein                                                                                                            |
| Mus Musculus | Fshr          | Follicle-stimulating hormone receptor                                                                                         |
| Mus Musculus | Serpind1      | Heparin cofactor 2                                                                                                            |

|              |        |                                 |
|--------------|--------|---------------------------------|
| Mus Musculus | Sun2   | SUN domain-containing protein 2 |
| Mus Musculus | Man2b1 | Lysosomal alpha-mannosidase     |
| Mus Musculus | Tagln2 | Transgelin-2                    |
| Mus Musculus | Spp1   | Osteopontin                     |
| Mus Musculus | Krt10  | Keratin, type I cytoskeletal 10 |
| Mus Musculus | Mgp    | Matrix Gla protein              |
| Mus Musculus | Gcn111 | N/A                             |
| Mus Musculus | Mmp28  | N/A                             |
| Mus Musculus | Tes    | N/A                             |
| Mus Musculus | Zfp646 | N/A                             |
| Mus Musculus | Cald1  | N/A                             |
| Mus Musculus | IFT52  | N/A                             |
| Mus Musculus | KMT2C  | N/A                             |

**Table S5.** Protein present in LMNV-PC common to LMNVs that crossed BBB and to LMNVs exposed to medium conditioned by bEnd.3 secretome.

| Taxonomy     | Gene names    | Protein names                                                                                      |
|--------------|---------------|----------------------------------------------------------------------------------------------------|
| Mus Musculus | Nid1          | Nidogen-1                                                                                          |
| Mus Musculus | Immt          | MICOS complex subunit Mic60                                                                        |
| Mus Musculus | Pgk1          | Phosphoglycerate kinase 1;Phosphoglycerate kinase                                                  |
| Mus Musculus | Tln1          | Talin-1                                                                                            |
| Mus Musculus | Hsd17b4       | Peroxisomal multifunctional enzyme type 2;(3R)-hydroxyacyl-CoA dehydrogenase;Enoyl-CoA hydratase 2 |
| Mus Musculus | Mecr          | Trans-2-enoyl-CoA reductase, mitochondrial                                                         |
| Mus Musculus | Eef1d         | Elongation factor 1-delta                                                                          |
| Mus Musculus | Uqcrb         | Cytochrome b-c1 complex subunit 7                                                                  |
| Mus Musculus | Hspd1         | 60 kDa heat shock protein, mitochondrial                                                           |
| Mus Musculus | Tpt1          | Translationally-controlled tumor protein                                                           |
| Mus Musculus | Podxl         | Podocalyxin                                                                                        |
| Mus Musculus | Flnb          | Filamin-B                                                                                          |
| Mus Musculus | Ppa1          | Inorganic pyrophosphatase                                                                          |
| Mus Musculus | Rpl5          | 60S ribosomal protein L5                                                                           |
| Mus Musculus | Ehd1          | EH domain-containing protein 1                                                                     |
| Mus Musculus | Dnaje13       |                                                                                                    |
| Mus Musculus | Idh3b         | Isocitrate dehydrogenase [NAD] subunit, mitochondrial                                              |
| Mus Musculus | Sptbn1        | Spectrin beta chain, non-erythrocytic 1                                                            |
| Mus Musculus | Pdia3         | Protein disulfide-isomerase A3                                                                     |
| Mus Musculus | Atp5a1        | ATP synthase subunit alpha;ATP synthase subunit alpha, mitochondrial                               |
| Mus Musculus | Pdia4         | Protein disulfide-isomerase A4                                                                     |
| Mus Musculus | Atp5b         | ATP synthase subunit beta, mitochondrial                                                           |
| Mus Musculus | Tapbp         | Tapasin                                                                                            |
| Mus Musculus | Pmpca         | Mitochondrial-processing peptidase subunit alpha                                                   |
| Mus Musculus | Ubr4          | E3 ubiquitin-protein ligase UBR4                                                                   |
| Mus Musculus | Pgd           | 6-phosphogluconate dehydrogenase, decarboxylating                                                  |
| Mus Musculus | Dstn          | Destrin                                                                                            |
| Mus Musculus | Pgam1         | Phosphoglycerate mutase 1                                                                          |
| Mus Musculus | Tcp1          | T-complex protein 1 subunit alpha                                                                  |
| Mus Musculus | Hint1         | Histidine triad nucleotide-binding protein 1                                                       |
| Mus Musculus | Rpl6          | 60S ribosomal protein L6                                                                           |
| Mus Musculus | Mapk1         | Mitogen-activated protein kinase 1                                                                 |
| Mus Musculus | Atp2a2        | Sarcoplasmic/endoplasmic reticulum calcium ATPase 2                                                |
| Mus Musculus | Ppp2r1a       | Serine/threonine-protein phosphatase 2A 65 kDa regulatory subunit A alpha isoform                  |
| Mus Musculus | Anxa4         | Annexin;Annexin A4                                                                                 |
| Mus Musculus | Tmed10        | Transmembrane emp24 domain-containing protein 10                                                   |
| Mus Musculus | Adpgk         | ADP-dependent glucokinase                                                                          |
| Mus Musculus | Icam1         | Intercellular adhesion molecule 1                                                                  |
| Mus Musculus | Mfge8         | Lactadherin                                                                                        |
| Mus Musculus | Acadm         | Medium-chain specific acyl-CoA dehydrogenase, mitochondrial                                        |
| Mus Musculus | Gsto1         | Glutathione S-transferase omega-1                                                                  |
| Mus Musculus | Prss55        | Serine protease 55                                                                                 |
| Mus Musculus | 2200002D01Rik | N/A                                                                                                |
| Mus Musculus | Atp5j2        | ATP synthase subunit f, mitochondrial                                                              |
| Mus Musculus | Tsfm          | Elongation factor Ts, mitochondrial                                                                |

|              |              |                                                                                                     |
|--------------|--------------|-----------------------------------------------------------------------------------------------------|
| Mus Musculus | Vim          | Vimentin                                                                                            |
| Mus Musculus | Sucla2       | Succinyl-CoA ligase [ADP-forming] subunit beta, mitochondrial                                       |
| Mus Musculus | Calr         | Calreticulin                                                                                        |
| Mus Musculus | Ano6         | Anoctamin-6                                                                                         |
| Mus Musculus | Irgm1        | Immunity-related GTPase family M protein 1                                                          |
| Mus Musculus | Rps3a        | 40S ribosomal protein S3a                                                                           |
| Mus Musculus | Hadhb        | 3-ketoacyl-CoA thiolase;Trifunctional enzyme subunit beta, mitochondrial                            |
| Mus Musculus | Atp1a1       | Sodium/potassium-transporting ATPase subunit alpha-1                                                |
| Mus Musculus | Dctn1        | Dynactin subunit 1                                                                                  |
| Mus Musculus | Lgals1       | Galectin-1                                                                                          |
| Mus Musculus | Rtn4         | Reticulon-4                                                                                         |
| Mus Musculus | Myh10        | Myosin-10                                                                                           |
| Mus Musculus | Serpinh1     | Serpin H1                                                                                           |
| Mus Musculus | Mthfd11      | Monofunctional C1-tetrahydrofolate synthase, mitochondrial                                          |
| Mus Musculus | Ifitm3       | Interferon-induced transmembrane protein 3                                                          |
| Mus Musculus | Rpn1         | Dolichyl-diphosphooligosaccharide--protein glycosyltransferase subunit 1                            |
| Mus Musculus | Hspg2        | Basement membrane-specific heparan sulfate proteoglycan core protein;Endorepellin;LG3 peptide       |
| Mus Musculus | Ctsd         | Cathepsin D                                                                                         |
| Mus Musculus | Aldh1l2      | Mitochondrial 10-formyltetrahydrofolate dehydrogenase                                               |
| Mus Musculus | Pkm          | Pyruvate kinase PKM                                                                                 |
| Mus Musculus | Gapdh;Gm3839 | Glyceraldehyde-3-phosphate dehydrogenase                                                            |
| Mus Musculus | Got2         | Aspartate aminotransferase, mitochondrial                                                           |
| Mus Musculus | Pecam1       | Platelet endothelial cell adhesion molecule                                                         |
| Mus Musculus | Ganab        | Neutral alpha-glucosidase AB                                                                        |
| Mus Musculus | Capg         | Macrophage-capping protein                                                                          |
| Mus Musculus | Pre1         | Protein regulator of cytokinesis 1                                                                  |
| Mus Musculus | Cd34         | Hematopoietic progenitor cell antigen CD34                                                          |
| Mus Musculus | Stat1        | Signal transducer and activator of transcription;Signal transducer and activator of transcription 1 |
| Mus Musculus | Rcn2         | Reticulocalbin-2                                                                                    |
| Mus Musculus | Cyb5r1       | NADH-cytochrome b5 reductase 1                                                                      |
| Mus Musculus | Iqgap1       | Ras GTPase-activating-like protein IQGAP1                                                           |
| Mus Musculus | Loxl4        | Lysyl oxidase homolog 4                                                                             |
| Mus Musculus | Acadl        | Long-chain specific acyl-CoA dehydrogenase, mitochondrial                                           |
| Mus Musculus | Capns1       | Calpain small subunit 1                                                                             |
| Mus Musculus | Eci1         | Enoyl-CoA delta isomerase 1, mitochondrial                                                          |
| Mus Musculus | Tmem109      | Transmembrane protein 109                                                                           |
| Mus Musculus | Pitrm1       | Presequence protease, mitochondrial                                                                 |
| Mus Musculus | Atp5h        | ATP synthase subunit d, mitochondrial                                                               |
| Mus Musculus | Wdr1         | WD repeat-containing protein 1                                                                      |
| Mus Musculus | Pfkl         | ATP-dependent 6-phosphofructokinase, liver type                                                     |
| Mus Musculus | Myh9         | Myosin-9                                                                                            |
| Mus Musculus | Mpst         | 3-mercaptopyruvate sulfurtransferase                                                                |
| Mus Musculus | Ephx1        | Epoxide hydrolase 1                                                                                 |
| Mus Musculus | Dysf         | Dysferlin                                                                                           |
| Mus Musculus | C1qbp        | Complement component 1 Q subcomponent-binding protein, mitochondrial                                |
| Mus Musculus | Anxa1        | Annexin A1                                                                                          |
| Mus Musculus | Anxa3        | Annexin;Annexin A3                                                                                  |



|              |              |                                                                                              |
|--------------|--------------|----------------------------------------------------------------------------------------------|
| Mus Musculus | Cyb5b        | Cytochrome b5 type B                                                                         |
| Mus Musculus | Rars         | Arginine--tRNA ligase, cytoplasmic                                                           |
| Mus Musculus | Esd          | S-formylglutathione hydrolase                                                                |
| Mus Musculus | Myof         | Myoferlin                                                                                    |
| Mus Musculus | Ahnak        |                                                                                              |
| Mus Musculus | Acot10;Acot9 | Acyl-coenzyme A thioesterase 10, mitochondrial;Acyl-coenzyme A thioesterase 9, mitochondrial |
| Mus Musculus | Lars         | Leucine--tRNA ligase, cytoplasmic                                                            |
| Mus Musculus | Maoa         | Amine oxidase [flavin-containing] A                                                          |
| Mus Musculus | Gdi2         | Rab GDP dissociation inhibitor beta                                                          |
| Mus Musculus | Dync1h1      | Cytoplasmic dynein 1 heavy chain 1                                                           |
| Mus Musculus | S100a4       | Protein S100-A4                                                                              |
| Mus Musculus | Eno1         | Alpha-enolase;Enolase                                                                        |
| Mus Musculus | Adgrf5       |                                                                                              |
| Mus Musculus | Mrps34       | 28S ribosomal protein S34, mitochondrial                                                     |
| Mus Musculus | Plec         | Plectin                                                                                      |
| Mus Musculus | Bst2         | Bone marrow stromal antigen 2                                                                |
| Mus Musculus | Inf2         | Inverted formin-2                                                                            |
| Mus Musculus | Cyc1         | Cytochrome c1, heme protein, mitochondrial                                                   |
| Mus Musculus | H2-D1        | H-2 class I histocompatibility antigen, D-B alpha chain                                      |
| Mus Musculus | Uqcrc2       | Cytochrome b-c1 complex subunit 2, mitochondrial                                             |
| Mus Musculus | Rpn2         | Dolichyl-diphosphooligosaccharide--protein glycosyltransferase subunit 2                     |
| Mus Musculus | Flna         | Filamin-A                                                                                    |
| Mus Musculus | Pck2         | Phosphoenolpyruvate carboxykinase [GTP], mitochondrial                                       |

**Table S6:** Protein detected in LMNV-PC present in LMNVs exposed to only FBS and in LMNVs exposed to medium conditioned by bEnd.3, but not present in the case of LMNVs that crossed BBB.

| Taxonomy   | Gene names               | Protein Names                                                                                                                                                                 |
|------------|--------------------------|-------------------------------------------------------------------------------------------------------------------------------------------------------------------------------|
| Bos Taurus | LGALS1                   | Galectin-1                                                                                                                                                                    |
| Bos Taurus | SERPINH1                 | Serpin H1                                                                                                                                                                     |
| Bos Taurus | TPT1                     | Translationally-controlled tumor protein                                                                                                                                      |
| Bos Taurus | ALDOB                    | Fructose-bisphosphate aldolase {ECO:0000256 RuleBase:RU003994, ECO:0000256 SAAS:SAAS00336718};Fructose-bisphosphate aldolase B                                                |
| Bos Taurus | PHGDH                    | D-3-phosphoglycerate dehydrogenase;D-3-phosphoglycerate dehydrogenase {ECO:0000256 RuleBase:RU363003}                                                                         |
| Bos Taurus | HPX                      | Hemopexin                                                                                                                                                                     |
| Bos Taurus |                          | Lactoylglutathione lyase {ECO:0000256 RuleBase:RU361179}                                                                                                                      |
| Bos Taurus | CPB2                     | Carboxypeptidase B2                                                                                                                                                           |
| Bos Taurus | COL18A1                  |                                                                                                                                                                               |
| Bos Taurus | COL6A3                   |                                                                                                                                                                               |
| Bos Taurus | TAGLN2                   | Transgelin-2                                                                                                                                                                  |
| Bos Taurus | FBP1                     | Fructose-1,6-bisphosphatase 1                                                                                                                                                 |
| Bos Taurus | LOC104968478;SAA1        | Serum amyloid A protein;Serum amyloid A protein {ECO:0000256 RuleBase:RU000539}                                                                                               |
| Bos Taurus | CPPED1                   | Serine/threonine-protein phosphatase CPPED1                                                                                                                                   |
| Bos Taurus | PGAM1                    | Phosphoglycerate mutase 1                                                                                                                                                     |
| Bos Taurus | LOC513659                |                                                                                                                                                                               |
| Bos Taurus | CHGB                     | Secretogranin-1                                                                                                                                                               |
| Bos Taurus | PF4                      | C-X-C motif chemokine {ECO:0000256 RuleBase:RU361149}                                                                                                                         |
| Bos Taurus | PLA2G7                   | Platelet-activating factor acetylhydrolase;Platelet-activating factor acetylhydrolase {ECO:0000256 PIRNR:PIRNR018169}                                                         |
| Bos Taurus | EIF3J                    | Eukaryotic translation initiation factor 3 subunit J {ECO:0000255 HAMAP-Rule:MF_03009};Eukaryotic translation initiation factor 3 subunit J {ECO:0000256 HAMAP-Rule:MF_03009} |
| Bos Taurus | MCF2                     |                                                                                                                                                                               |
| Bos Taurus | PROC                     | Vitamin K-dependent protein C                                                                                                                                                 |
| Bos Taurus |                          | Sulfhydryl oxidase {ECO:0000256 RuleBase:RU371123}                                                                                                                            |
| Bos Taurus | HSPB1                    | Heat shock protein beta-1                                                                                                                                                     |
| Bos Taurus | GSTM1;GSTM2;LOC100295687 | Glutathione S-transferase {ECO:0000256 RuleBase:RU003494};Glutathione S-transferase Mu 1                                                                                      |
| Bos Taurus | PBLD                     | Phenazine biosynthesis-like domain-containing protein                                                                                                                         |
| Bos Taurus | LAP3                     | Cytosol aminopeptidase                                                                                                                                                        |
| Bos Taurus | PRDX6                    | Peroxiredoxin-6                                                                                                                                                               |
| Bos Taurus | CTSL;CTSV                | Cathepsin L1;Cathepsin L2                                                                                                                                                     |
| Bos Taurus | CAT                      | Catalase                                                                                                                                                                      |
| Bos Taurus | APCS                     | Serum amyloid P-component                                                                                                                                                     |
| Bos Taurus | APOH                     | Beta-2-glycoprotein 1                                                                                                                                                         |
| Bos Taurus | CHGA                     | Chromogranin-A {ECO:0000303 PubMed:3018587, ECO:0000303 PubMed:3755681}                                                                                                       |
| Bos Taurus | CST3                     | Cystatin-C                                                                                                                                                                    |
| Bos Taurus | PDZK1                    | Na(+)/H(+) exchange regulatory cofactor NHE-RF3                                                                                                                               |
| Bos Taurus | HABP2                    | Hyaluronan-binding protein 2                                                                                                                                                  |
| Bos Taurus | CAPNS1                   | Calpain small subunit 1                                                                                                                                                       |
| Bos Taurus | S100A12                  | Protein S100 {ECO:0000256 RuleBase:RU361184};Protein                                                                                                                          |

|            |           |                                                                                                     |
|------------|-----------|-----------------------------------------------------------------------------------------------------|
|            |           | S100-A12                                                                                            |
| Bos Taurus | THBS4     | Thrombospondin-4                                                                                    |
| Bos Taurus | ESD       | S-formylglutathione hydrolase                                                                       |
| Bos Taurus | LOC528040 |                                                                                                     |
| Bos Taurus | HINT1     | Histidine triad nucleotide-binding protein 1                                                        |
| Bos Taurus | TNNT2     | Troponin T, cardiac muscle                                                                          |
| Bos Taurus | SELENOP   | Selenoprotein P {ECO:0000305}                                                                       |
| Bos Taurus | TIMP3     | Metalloproteinase inhibitor 3                                                                       |
| Bos Taurus | PEBP1     | Phosphatidylethanolamine-binding protein 1                                                          |
| Bos Taurus | IGFBP3    | Insulin-like growth factor-binding protein 3                                                        |
| Bos Taurus | TGFBI     | Transforming growth factor-beta-induced protein ig-h3                                               |
| Bos Taurus | CTSC      | Dipeptidyl peptidase 1                                                                              |
| Bos Taurus | FABP1     | Fatty acid-binding protein, liver                                                                   |
| Bos Taurus |           | Fructose-bisphosphate aldolase<br>{ECO:0000256 RuleBase:RU003994,<br>ECO:0000256 SAAS:SAAS00336718} |
| Bos Taurus | RBP4      | Retinol-binding protein<br>{ECO:0000256 PIRNR:PIRNR036893};Retinol-binding protein<br>4             |
| Bos Taurus | ITPA      | Inosine triphosphate pyrophosphatase {ECO:0000255 HAMAP-<br>Rule:MF_03148}                          |
| Bos Taurus | HINT1     | Histidine triad nucleotide-binding protein 1                                                        |
| Bos Taurus | TNNT2     | Troponin T, cardiac muscle                                                                          |

**Table S7.** Protein present in LMNV-PC in all experimental conditions

| <b>Taxonomy</b> | <b>Gene names</b> | <b>Protein Names</b>                                                                      |
|-----------------|-------------------|-------------------------------------------------------------------------------------------|
| Bos Taurus      | ENO1              | Alpha-enolase                                                                             |
| Bos Taurus      | TTR               | Transthyretin                                                                             |
| Bos Taurus      | PGK1              | Phosphoglycerate kinase<br>{ECO:0000256 RuleBase:RU000532};Phosphoglycerate kinase 1      |
| Bos Taurus      |                   | Fibulin-1 {ECO:0000256 PIRNR:PIRNR036313}                                                 |
| Bos Taurus      | A1BG              | Alpha-1B-glycoprotein {ECO:0000250 UniProtKB:P04217}                                      |
| Bos Taurus      | APOD              | Apolipoprotein D;Apolipoprotein D<br>{ECO:0000256 PIRNR:PIRNR036893}                      |
| Bos Taurus      | APOC3             | Apolipoprotein C-III                                                                      |
| Bos Taurus      | SERPINA7          | Thyroxine-binding globulin                                                                |
| Bos Taurus      | AMBP              | Protein AMBP                                                                              |
| Bos Taurus      | STIP1             | Stress-induced-phosphoprotein 1                                                           |
| Bos Taurus      | SERPINF2          | Alpha-2-antiplasmin                                                                       |
| Bos Taurus      | GSTA1             | Glutathione S-transferase<br>{ECO:0000256 RuleBase:RU003494};Glutathione S-transferase A1 |
| Bos Taurus      | ITIH3             | Inter-alpha-trypsin inhibitor heavy chain H3                                              |
| Bos Taurus      | APOA2             | Apolipoprotein A-II                                                                       |
| Bos Taurus      | PROZ              | Vitamin K-dependent protein Z                                                             |
| Bos Taurus      | PTGR1             | Prostaglandin reductase 1                                                                 |
| Bos Taurus      | VASN              |                                                                                           |
| Bos Taurus      | CHIA              | Acidic mammalian chitinase                                                                |
| Bos Taurus      | CPN1              | Carboxypeptidase N catalytic chain                                                        |
| Bos Taurus      | SPP1              | Osteopontin;Osteopontin-K                                                                 |
| Bos Taurus      | ITIH1             | Inter-alpha-trypsin inhibitor heavy chain H1                                              |
| Bos Taurus      | SULT1E1           | Estrogen sulfotransferase;Sulfotransferase<br>{ECO:0000256 RuleBase:RU361155}             |
| Bos Taurus      | MB                | Myoglobin                                                                                 |
| Bos Taurus      |                   | Factor XIIa inhibitor                                                                     |
| Bos Taurus      | OMD               | Osteomodulin                                                                              |
| Bos Taurus      | C4;LOC107131209   | Complement C4                                                                             |
| Bos Taurus      | CFD               | Complement factor D                                                                       |
| Bos Taurus      | GPLD1             | Phosphatidylinositol-glycan-specific phospholipase D                                      |
| Bos Taurus      | MGP               | Matrix Gla protein                                                                        |
| Bos Taurus      | LDHA              | L-lactate dehydrogenase A chain                                                           |
| Bos Taurus      | SERPINA1          | Alpha-1-antiproteinase                                                                    |
| Bos Taurus      | LUM               | Lumican                                                                                   |
| Bos Taurus      | AFP               | Alpha-fetoprotein                                                                         |
| Bos Taurus      | FGB               | Fibrinogen beta chain                                                                     |
| Bos Taurus      | SERPINA5          | Plasma serine protease inhibitor                                                          |
| Bos Taurus      | AFM               | Afamin {ECO:0000303 PubMed:26902720}                                                      |
| Bos Taurus      | C9                | Complement component C9                                                                   |
| Bos Taurus      | RGN               | Regucalcin                                                                                |
| Bos Taurus      | F9                | Coagulation factor IX                                                                     |
| Bos Taurus      | SAA4              | Serum amyloid A-4 protein                                                                 |
| Bos Taurus      | GGH               | Gamma-glutamyl hydrolase                                                                  |
| Bos Taurus      | TPI1              | Triosephosphate isomerase                                                                 |
| Bos Taurus      | FGA               | Fibrinogen alpha chain                                                                    |
| Bos Taurus      | SPP2              | Secreted phosphoprotein 24                                                                |
| Bos Taurus      | C7                | Complement component C7                                                                   |
| Bos Taurus      | GSN               | Gelsolin                                                                                  |
| Bos Taurus      | SERPINA6          | Corticosteroid-binding globulin                                                           |

|            |                      |                                                         |
|------------|----------------------|---------------------------------------------------------|
| Bos Taurus | LOC784932;SERPINA3-7 | Serpin A3-7                                             |
| Bos Taurus | F5                   | Coagulation factor V                                    |
| Bos Taurus | APOE                 | Apolipoprotein E                                        |
| Bos Taurus | HBA                  | Hemoglobin subunit alpha                                |
| Bos Taurus | A2M                  | Alpha-2-macroglobulin                                   |
| Bos Taurus | HBB                  | Hemoglobin fetal subunit beta;Hemoglobin subunit beta   |
| Bos Taurus | GC                   | Vitamin D-binding protein                               |
| Bos Taurus | FN1                  | Fibronectin                                             |
| Bos Taurus | APOA1                | Apolipoprotein A-I                                      |
| Bos Taurus | APOA4                | Apolipoprotein A-IV                                     |
| Bos Taurus | LBP                  | Lipopolysaccharide-binding protein                      |
| Bos Taurus | F2                   | Prothrombin                                             |
| Bos Taurus | AHSG                 | Alpha-2-HS-glycoprotein                                 |
| Bos Taurus | MST1                 | Hepatocyte growth factor-like protein                   |
| Bos Taurus | PLG                  | Plasminogen;Plasminogen {ECO:0000256 PIRNR:PIRNR001150} |
| Bos Taurus | BLVRB                | Flavin reductase (NADPH)                                |
| Bos Taurus | FGG                  | Fibrinogen gamma-B chain                                |
| Bos Taurus | CFB                  | Complement factor B                                     |
| Bos Taurus | ALB                  | Serum albumin                                           |
| Bos Taurus | ITIH4                | Inter-alpha-trypsin inhibitor heavy chain H4            |
| Bos Taurus | PROS1                | Vitamin K-dependent protein S                           |
| Bos Taurus | C3                   | Complement C3                                           |
| Bos Taurus | LTF;TF               | Lactotransferrin;Serotransferrin                        |
